# Supplementary material
Source: PubMed Central journal article supplement (PMC5286365)
Supplement: EMBJ-36-301-s001.pdf [file EMBJ-36-301-s001.pdf]

1 **APPENDIX**

2

3 **Replication fork passage drives the asymmetric dynamics of a critical nucleoid-**  
4 **associated protein in *Caulobacter***

5

6 Rodrigo Arias-Cartin<sup>1,2</sup>, Genevieve S. Dobihal<sup>1,3,#</sup>, Manuel Campos<sup>1,2,3</sup>, Ivan V. Surovtsev<sup>1,2,3</sup>,  
7 Bradley Parry<sup>1,2</sup> and Christine Jacobs-Wagner\*<sup>1,2,3,4</sup>

8

9 <sup>1</sup>Microbial Sciences Institute, Yale University, West Haven, CT 06516, USA

10 <sup>2</sup>Department of Molecular, Cellular, and Developmental Biology, Yale University, New Haven,  
11 CT 06520, USA

12 <sup>3</sup>Howard Hughes Medical Institute, Yale University, New Haven, CT 06520, USA

13 <sup>4</sup>Department of Microbial Pathogenesis, Yale Medical School, Yale University, New Haven, CT  
14 06520, USA

15 \*Corresponding author

16 #Present address: Department of Microbiology and Immunology, Harvard Medical School,  
17 Boston, MA 02115, USA

18

19 Table of contents

20 1. Appendix Figure legends S1-S12

21 2. Appendix Figure S1-S12

22 3. Appendix Supplementary Methods

23 4. Appendix Table S1 Strains and plasmids used in this study

24 5. Appendix Table S2 Construction of Strains and plasmids used in this study

25 6. Appendix Table S3 List of oligonucleotides used in this study

26 7. Appendix References

27

28 **Appendix Figure legends**

29 **Appendix Figure S1. Loss of SMC or HU function does not affect cell morphology or**  
30 **growth in *C. crescentus*.**

31 **A.** Strains harboring in-frame deletions of  $\Delta smc::km$  (strain ML2118) or a double deletion of  
32  $\Delta hup1::sp$  and  $\Delta hup2::oxy$  that encode HU subunits (strain ML2120) were grown to exponential  
33 phase in M2G minimal medium prior to staining with DAPI to visualize the chromosome. Yellow  
34 lines show the cell contours detected with Oufiti from the corresponding phase-contrast image.  
35 Scale = 2  $\mu m$

36 **B.** Cell length distributions of the  $\Delta hup1\Delta hup2$  and  $\Delta smc$  deletion strains when grown under the  
37 indicated conditions. For each condition, at least 1275 cells were analyzed.

38 **C.** Doubling times based on  $OD_{660nm}$  measurements by a microplate reader for strains WT  
39 (CB15N),  $\Delta gapR::oxy gapR-Venus$  (CJW5777),  $\Delta smc$  and  $\Delta hup1\Delta hup2$ .

40 **D.** Phase-contrast images showing that WT cells and cells expressing GapR-Venus at *xyiX*  
41 locus as the only copy (CJW5777) have the same morphology. Scale = 2  $\mu m$ .

42

43 **Appendix Figure S2. GapR binds DNA in *E. coli***

44 **A.** Colocalization of the nucleoid and *C. crescentus* GapR in an *E. coli* cell expressing GapR-  
45 sfGFP (strain CJW5794). Expression of GapR-sfGFP was induced with 0.02% arabinose for 2 h  
46 in M9Glycerol medium, followed by DAPI staining. Scale = 1  $\mu m$ .

47 **B.** Fluorescence intensity profiles of GapR-sfGFP and DAPI signals along the length of the cell  
48 shown in panel A.

49 **C.** SDS-PAGE analysis of purified 6His-GapR protein (~10  $\mu g$ ) stained with Coomassie.

50

51 **Appendix Figure S3. Deletion of *CCNA\_03907* is not associated with morphological or**  
52 **growth defects in *C. crescentus*.**

53 **A.** Chromosomal location of *CCNA\_03907*.

54 **B.** Phase-contrast images showing the morphology of cells deleted for *CCNA\_03907*  
55 (CJW5816), the gene directly downstream of *gapR*. For imaging, strain CJW5816 harboring an  
56 in-frame deletion of *CCNA\_03907:: $\Omega$*  was grown to exponential phase in M2G minimal medium  
57 or PYE rich medium at 25 or 30°C. Scale = 2  $\mu m$ .

58 **C.** Cell length distributions of *CCNA\_03907:: $\Omega$*  deletion strain when grown under indicated  
59 conditions. For each condition, at least 1187 cells were analyzed.

60 **D.** Doubling times based on  $OD_{660nm}$  measurements by a microplate reader. The growth  
61 conditions correspond to those in panel B.

62 **Appendix Figure S4. Distribution of cells with and without DnaN-mCherry foci in *C.***  
63 ***crenscentus*.**

64 **A.** Histogram of cell length for CJW5800 cells exhibiting 0, 1 or 2 DnaN-mCherry foci in strain  
65 CJW5800 (n = 8358 cells). The integral of each curve is 1. See Computer Code EV1A  
66 information for details of foci detection algorithm.

67  
68 **B.** Same as A but relative to the fraction of the population (number of cells with 0 spot = 2103,  
1 spot = 4683, 2 spots = 1476 and >2 spots = 96).

69 **Appendix Figure S5. Correlated dynamics of GapR and DnaN localization during the cell**  
70 **cycle.**

71 Kymographs showing the localization of GapR-Venus and DnaN-CFP over time in 5 different  
72 cells (strain CJW5932) following synchrony. Cellular coordinates were oriented using the DnaN-  
73 CFP bright focus as an old-pole marker.

74

75 **Appendix FigureS6. HU2-mCherry and DnaN dynamics are independent during the cell**  
76 **cycle.**

77 Kymographs showing the localization of HU2-mCherry and DnaN-CFP over time in 5 different  
78 cells (strain CJW5963) following synchrony. Cellular coordinates were oriented using the DnaN-  
79 CFP bright focus as an old-pole marker.

80

81 **Appendix Figure S7. Cell cycle dynamics of GapR localization are not caused by changes**  
82 **in CcrM-dependent methylation**

83 **A.** Demograph showing the cell cycle localization of GapR-Venus in an asynchronous  
84 population (n = 2700 cells) of a strain (CJW5825) constitutively producing CcrM. The  
85 fluorescence profile across cell was normalized by cell length for each cell. Cells were sorted by  
86 increasing cell length, and cell coordinates were oriented using TipN-CFP as a new-pole  
87 marker.

88 **B.** Kymographs showing the spatial distribution of Red-Venus and DnaN-CFP over time in 4  
89 different CJW5775 cells constitutively producing CcrM. Time-lapse microscopy started right  
90 after synchrony. Cell coordinates were oriented using DnaN-CFP bright focus as an old-pole  
91 marker.

92

93

94

95 **Appendix Figure S8. GapR forms long-lived complexes with DNA that are disrupted by**  
96 **replisome progression**

97 Kymographs of 3 different FtsZ-depleted cells (CJW5808) expressing GapR-Venus and DnaN-  
98 CFP. FtsZ depletion was initiated after synchronization by allowing cells to resume cell cycle  
99 progression without xylose (*ftsZ* expression inducer).

100

101 **Appendix Figure S9. Simulations showing the effect of spontaneous dissociation vs. no**  
102 **dissociation from DNA on the localization profile of a DNA-binding protein**

103 **A.** Distribution of a fluorescently-labeled DNA-binding protein in a simulation of the replisome-  
104 dependent model with spontaneous protein dissociation from the DNA. The simulation started  
105 with a random distribution and considered a spontaneous dissociation from the DNA with a  
106 characteristic time of  $\tau = 1$  min. Protein re-association with the DNA occurred with a uniform  
107 probability along the DNA, thereby homogenizing protein distribution over time, as shown in a  
108 kymograph.

109 **B.** Same random distribution at  $t = 0$  and simulated as in A, except for no spontaneous  
110 dissociation. Because of the lack of dissociation from the DNA, the initial stochastic distribution  
111 of the DNA-binding protein is maintained over time. As a result, any stochastic accumulations  
112 present at  $t = 0$  is retained, producing horizontal streaks of fluorescent signal in kymographs.

113

114 **Appendix Figure S10. The asymmetric distribution of GapR over the chromosome is**  
115 **maintained over replication cycles in the replisome-eviction model.**

116 Simulated profile of GapR in G1 phase for each cycle of DNA replication. Simulations start with  
117 a uniform distribution of GapR along the chromosome (Replication cycle 1). After 9 replication  
118 cycles, the distribution of GapR in the following G1 phase ( $10^{\text{th}}$  convolved) was convolved with a  
119 point spread function corresponding to our optical set-up.

120

121 **Appendix Figure S11. Comparison between the GapR ChIP-seq coverage and the**  
122 **replisome-eviction model over the chromosome in an asynchronous population**

123 The chromosomal profile of the GapR ChIP-seq data from an asynchronous experiment was  
124 overlaid with the model prediction (black line = simulated profile). For the ChIP data, the  
125 coverage reads were normalized to the total area of the distribution. Calculation of the simulated  
126 profile was based on the cell age distribution and the fraction of cells ongoing DNA replication  
127 (S phase) in an asynchronous population ( $n = 8358$  cells, CJW5800 cells) expressing DnaN-  
128 CFP. For details, see Appendix Supplementary Methods section.

129 **Appendix Figure S12. Spontaneous dissociation of GapR from the DNA with a**  
130 **characteristic time of  $\tau_{\text{off}} = 100$  min does not affect the binding asymmetry of GapR**

131 We generated the same simulations, plots and kymographs as in Fig 8, except that here we  
132 used a modified replisome-dependent model in which GapR spontaneously dissociates from the  
133 DNA with a characteristic time  $\tau_{\text{off}} = 100$  min.

134 **A.** One-dimensional simulation of the replisome-eviction model showing the evolution of GapR  
135 distribution on replicated and unreplicated DNA during replisome progression. In the model,  
136 GapR is synthesized throughout the cell cycle such that its amount (1,000 molecules) has  
137 doubled by the end of the cell cycle. At  $t = 0$  (in cell cycle unit), GapR binding along the  
138 chromosome is uniform. We assume that replication starts at  $t = 0.3$  and ends at  $t = 0.9$ . The  
139 replisome moves at a constant speed from *ori* to *ter*, and leaves behind 2 copies of the  
140 replicated DNA region (sister chromatids). When the replisome encounters GapR, the replisome  
141 displaces GapR from the DNA. In addition, GapR spontaneously dissociates from the DNA with  
142 a characteristic time  $\tau_{\text{off}} = 100$  min. The displaced and dissociated GapR is then randomly  
143 redistributed, with uniform probability over the two replicated regions and the unreplicated  
144 region.

145 **B.** Same as in A, but starting with the GapR distribution at  $t = 1$  in panel A to show the effect of  
146 a second round of replisome progression on GapR distribution on replicated and unreplicated  
147 DNA.

148 **C.** Kymograph of simulated GapR distribution over cell cycle time in wild-type cells. The green  
149 dashed line indicates replisome progression. GapR distribution between  $t = 0$  and  $t = 0.2$  is the  
150 same as between  $t = 0.2$  and  $t = 0.3$ .

151 **D.** Same as C but after convolution of the GapR signal with an idealized Gaussian PSF with a  
152 standard deviation of our optical set-up (0.065 in relative cell-length units).

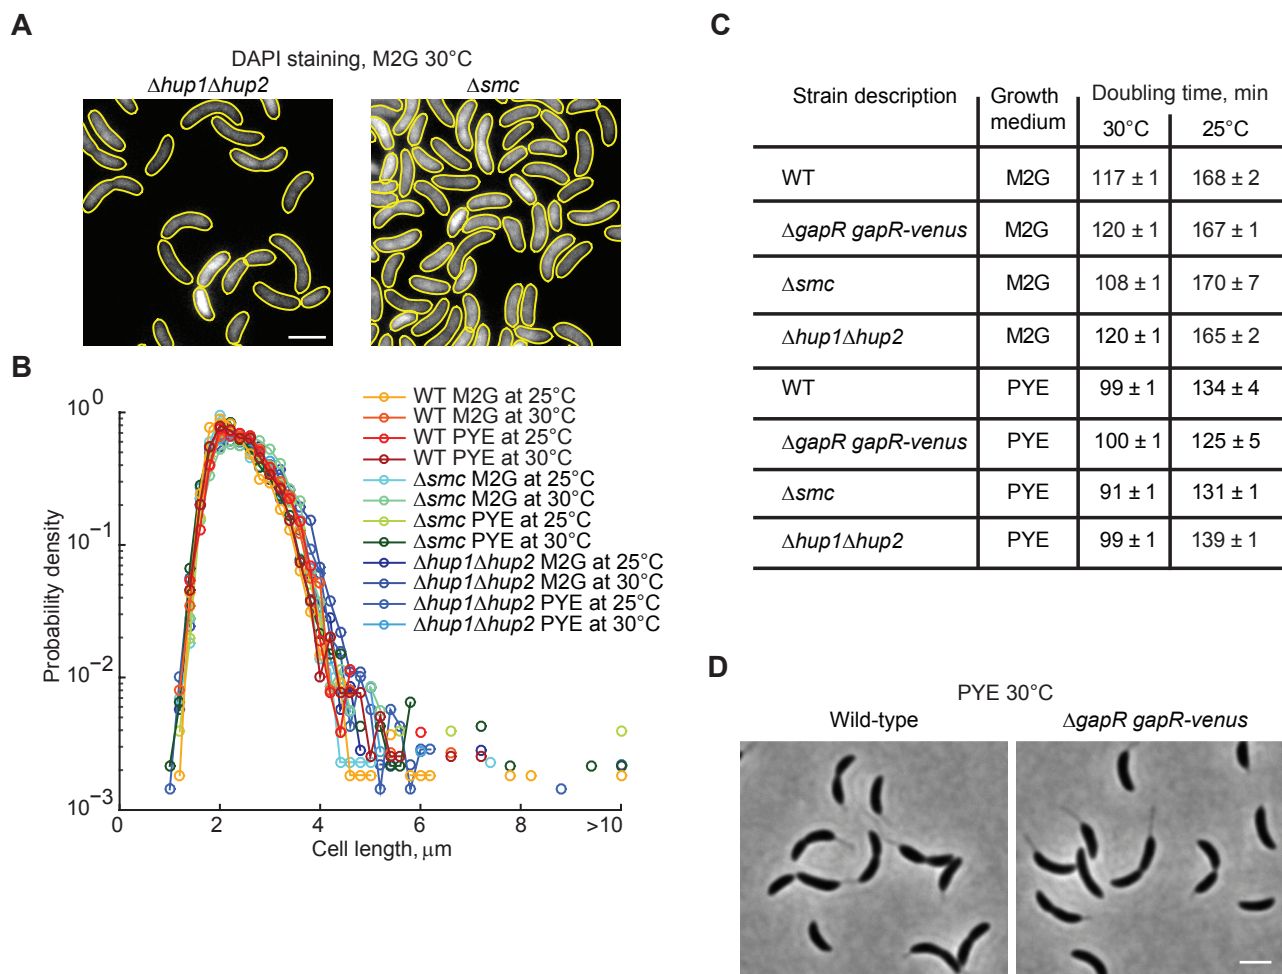

Figure S1

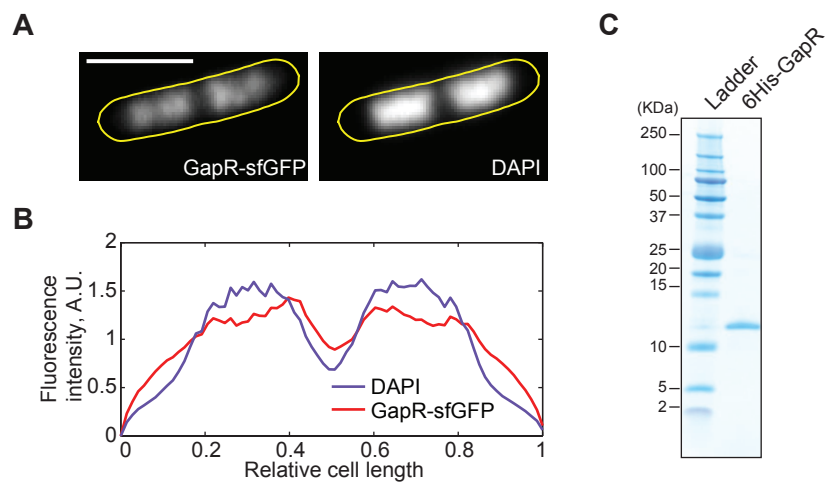

Figure S2

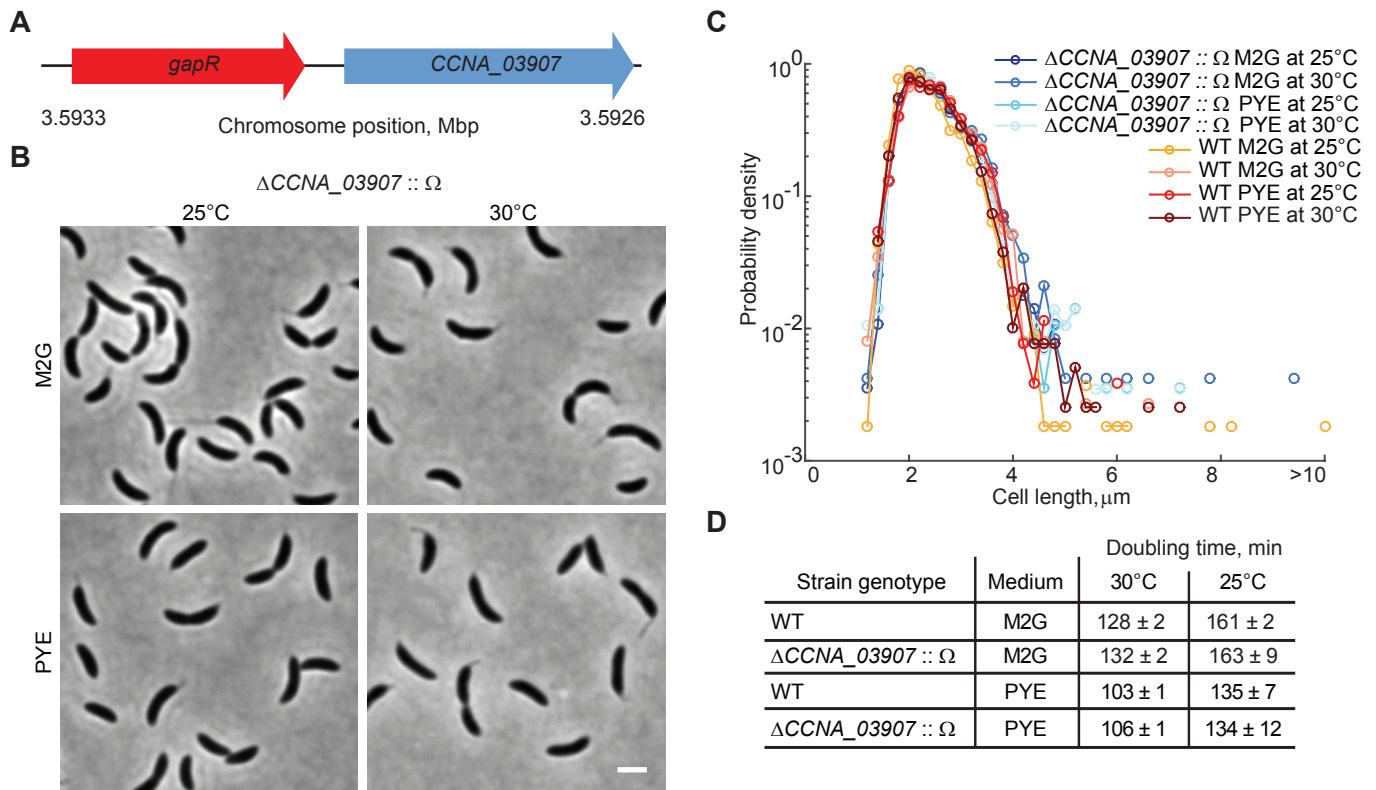

Figure S3



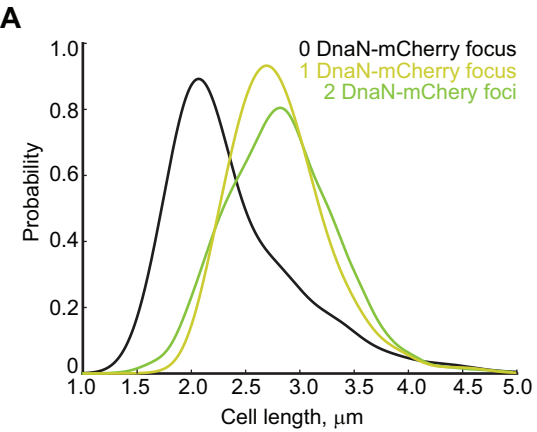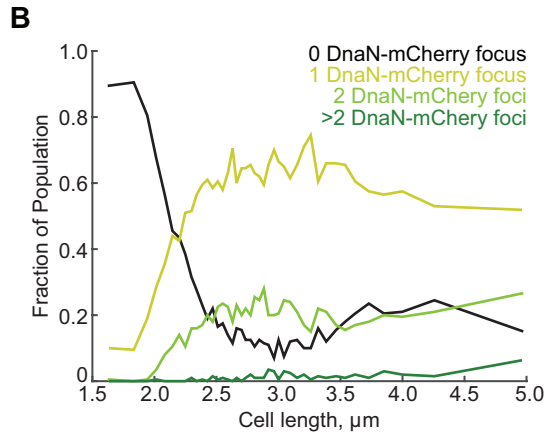

**Figure S4**

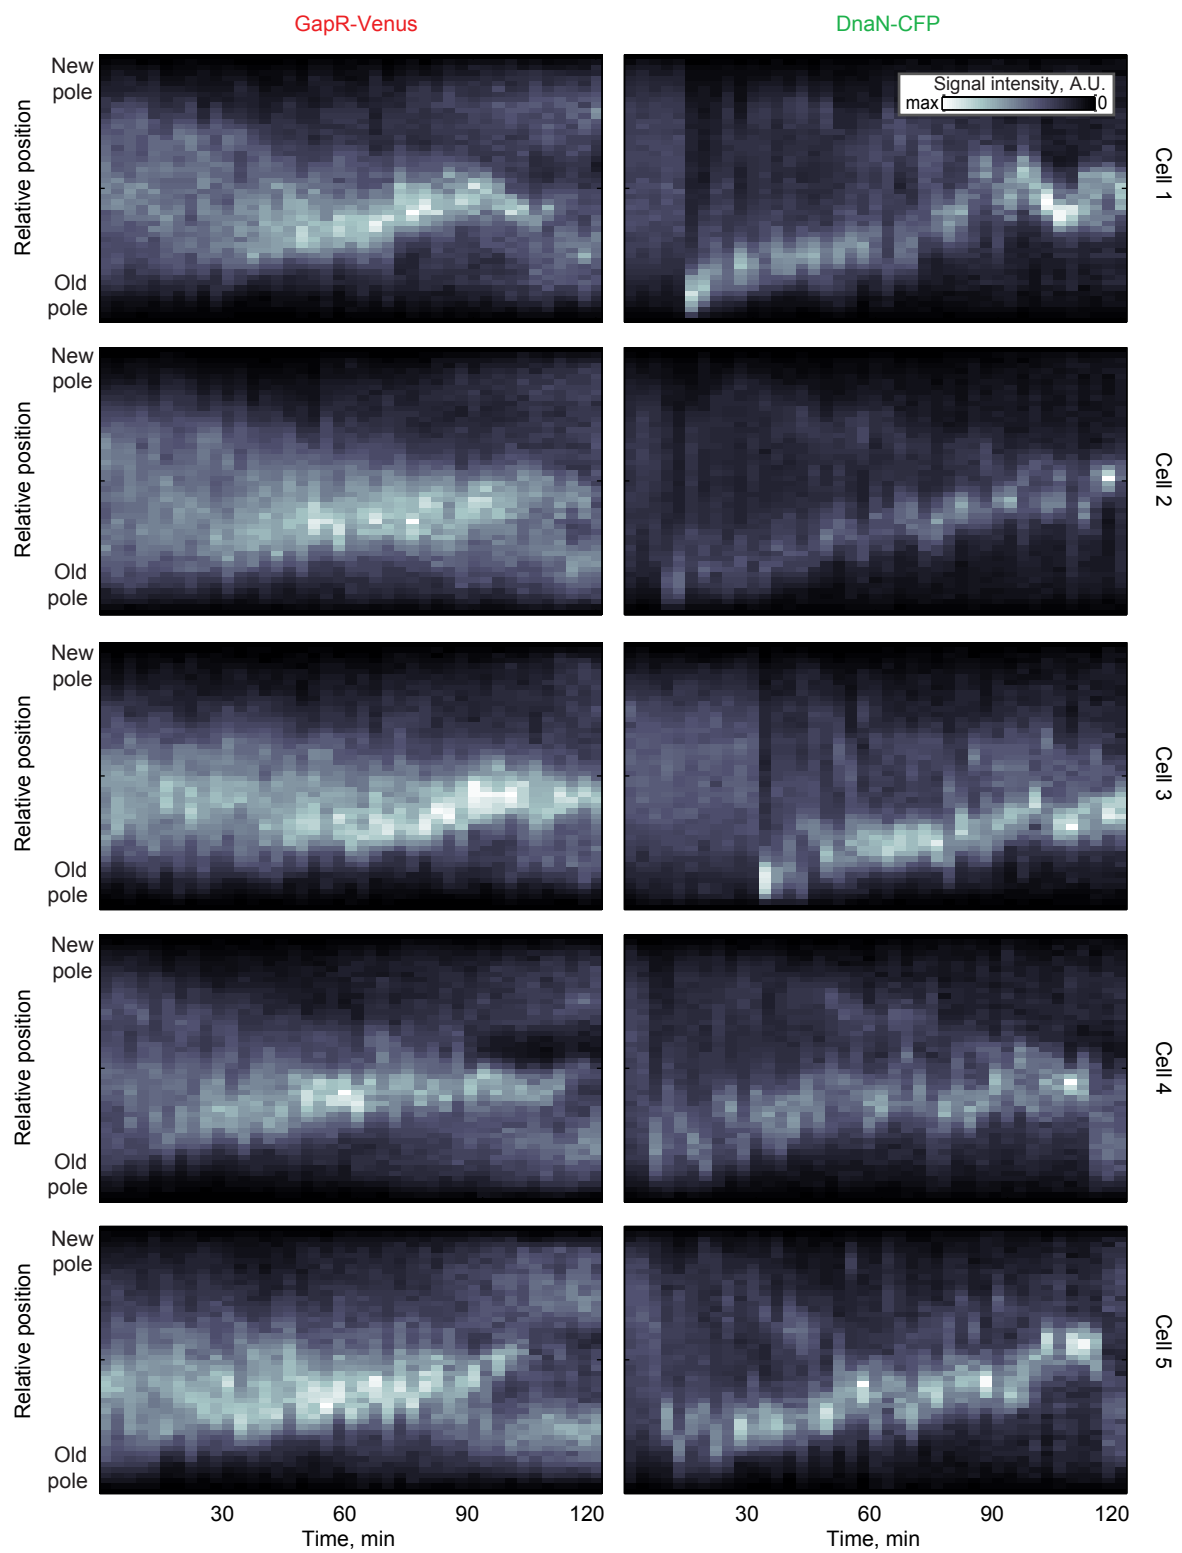

Figure S5

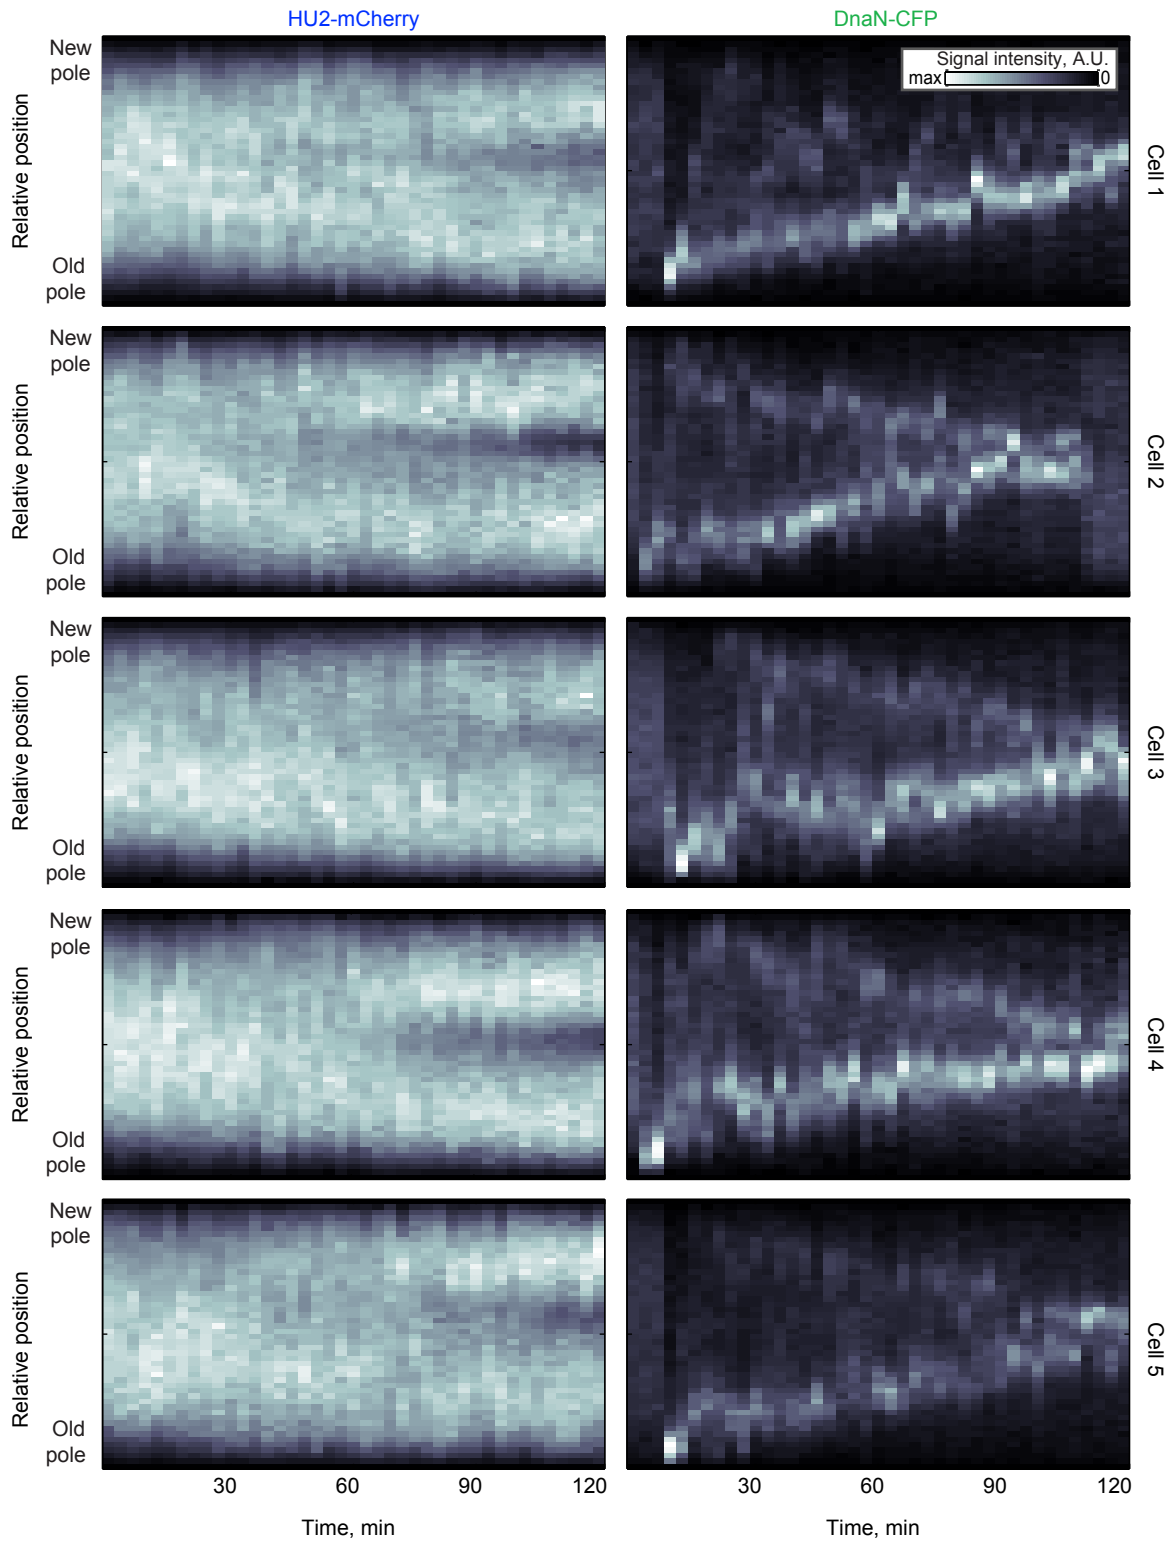

**Figure S6**

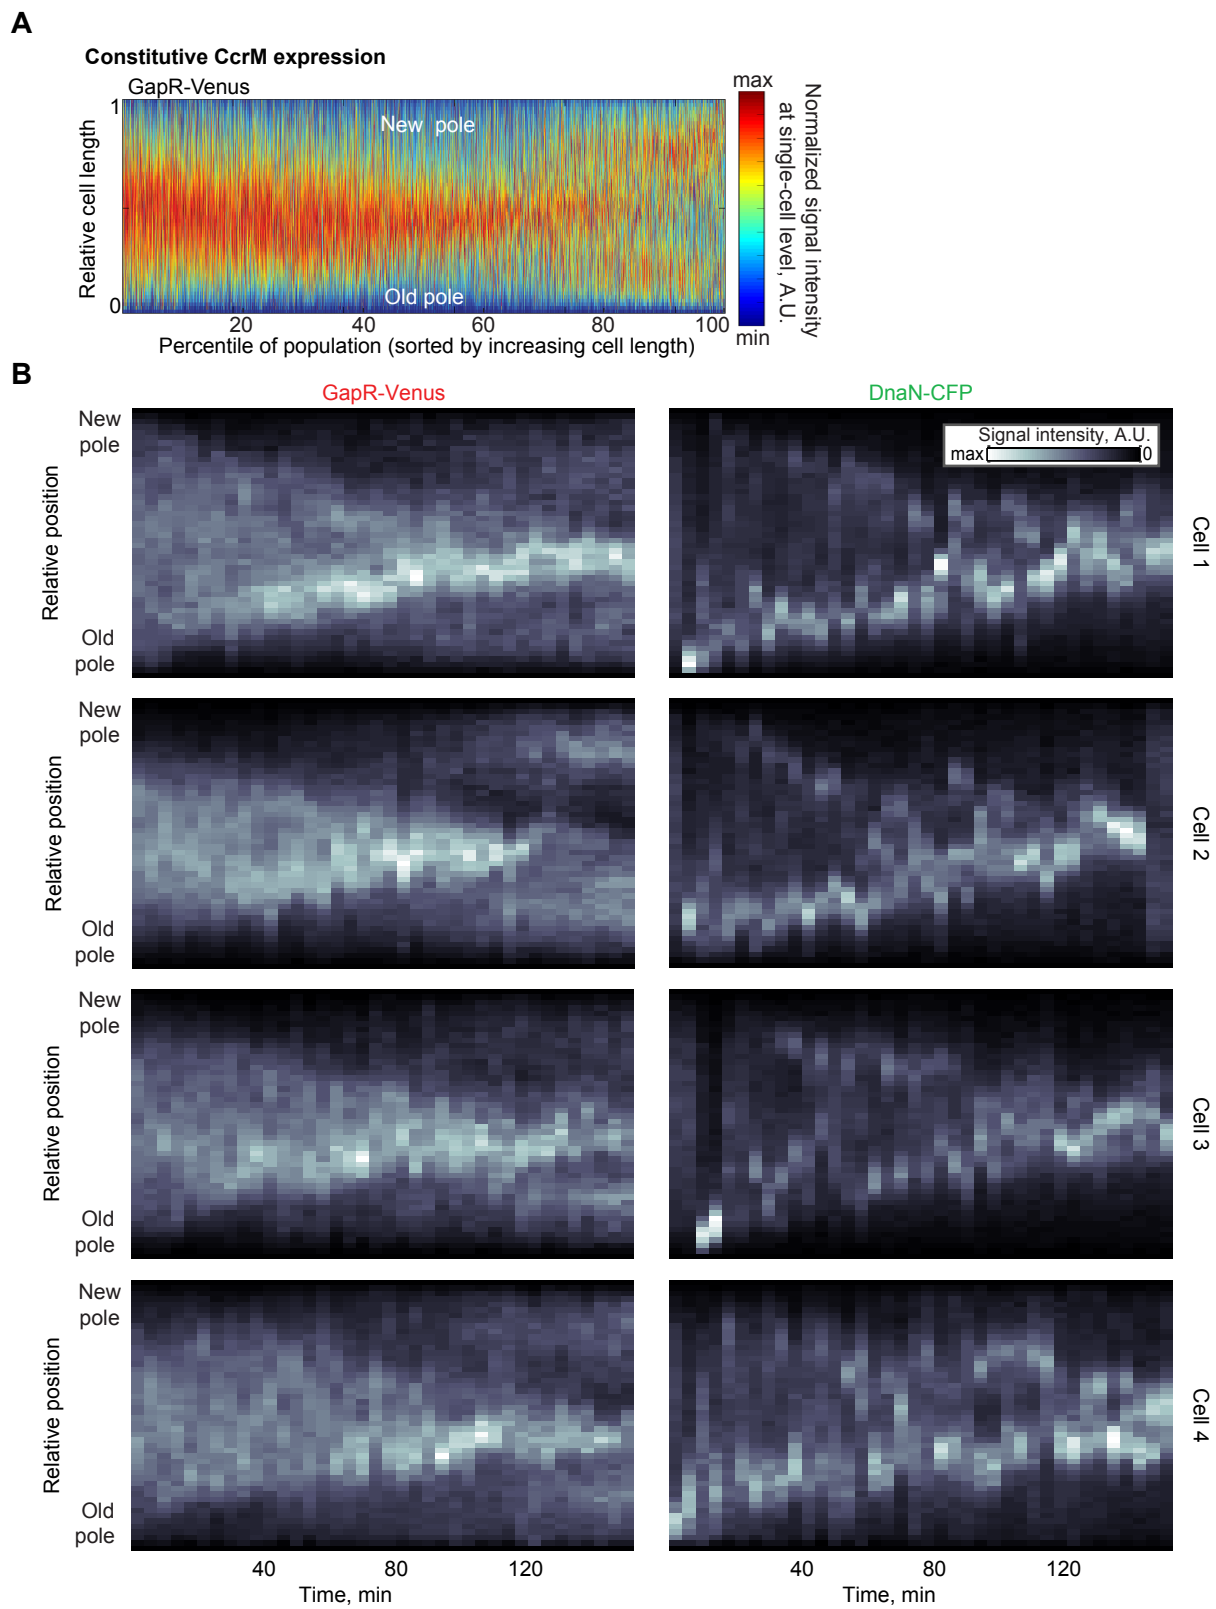

**Figure S7**

**FtsZ-depleted cell 1**

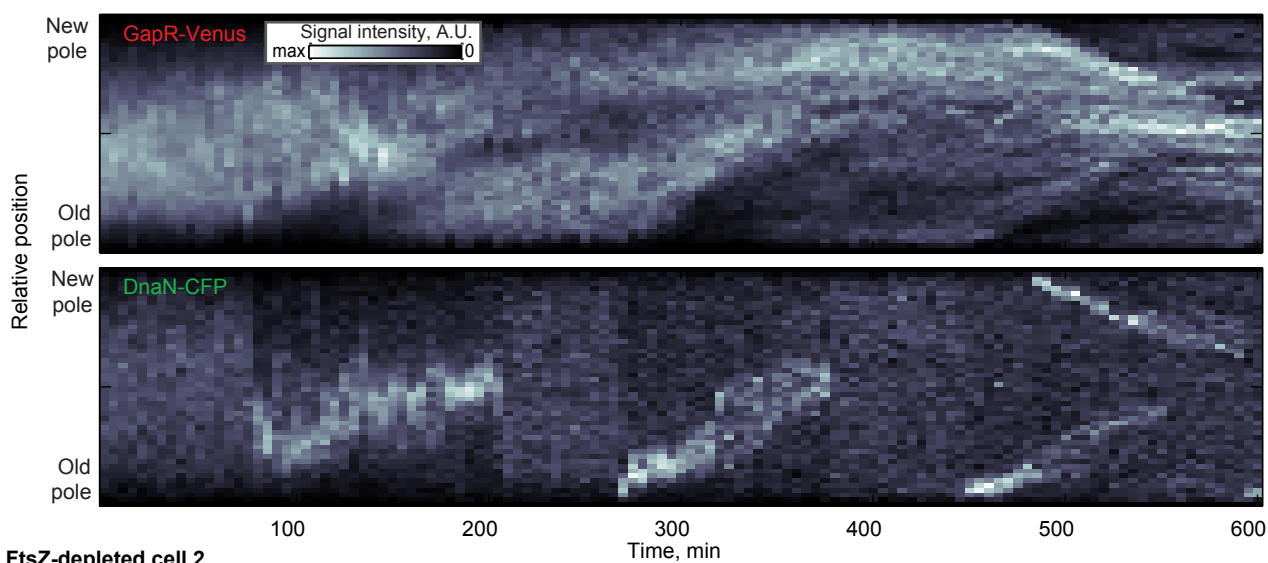

**FtsZ-depleted cell 2**

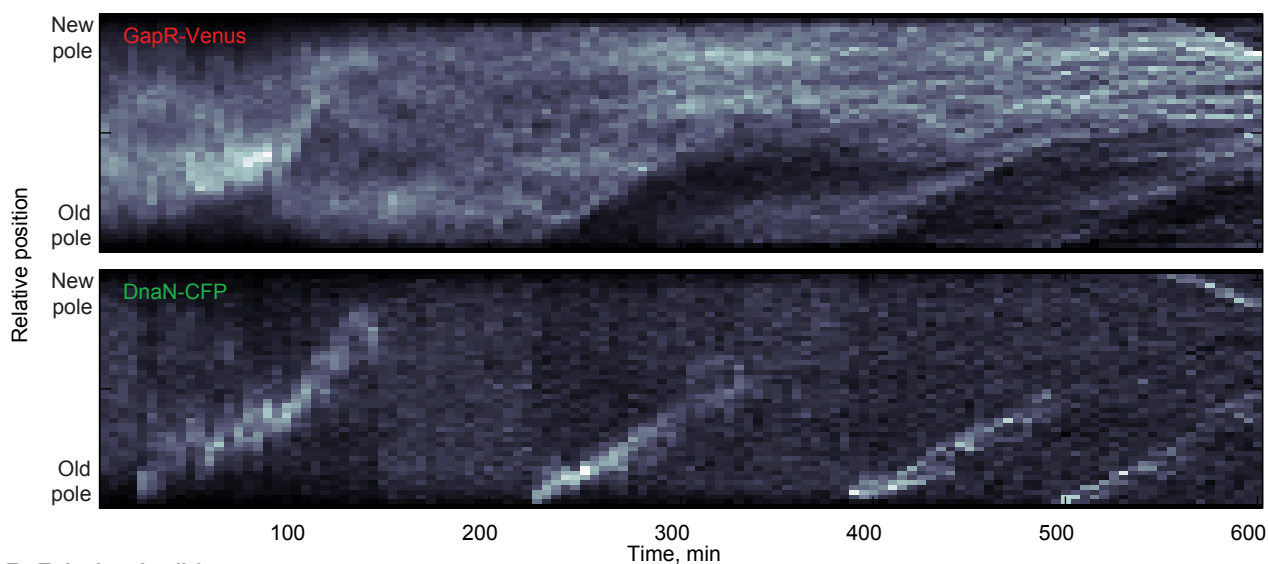

**FtsZ-depleted cell 3**

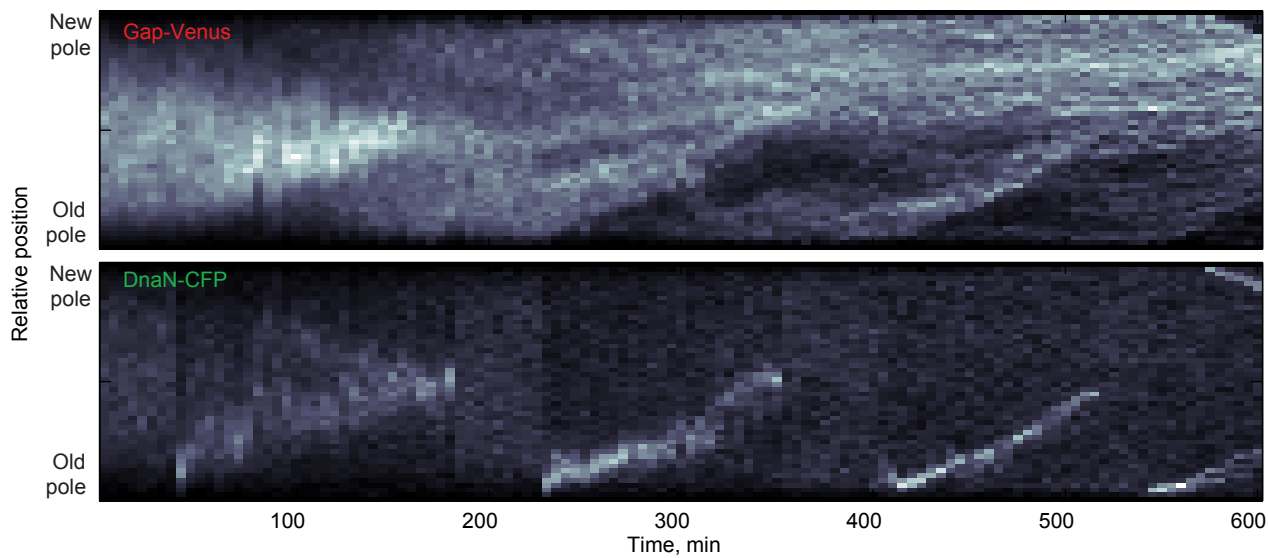

**Figure S8**

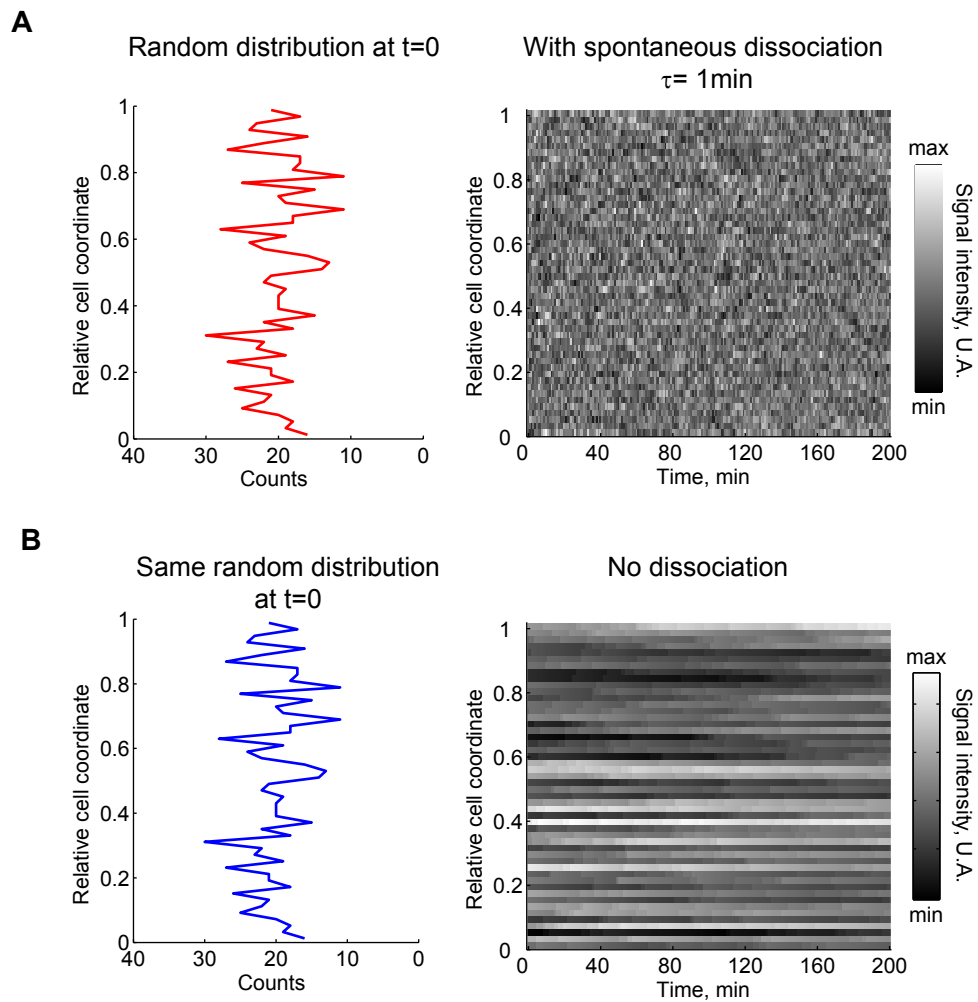

**Figure S9**

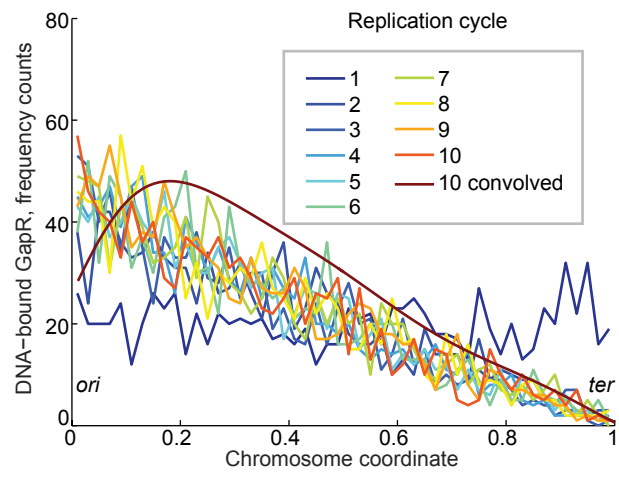

**Figure S10**

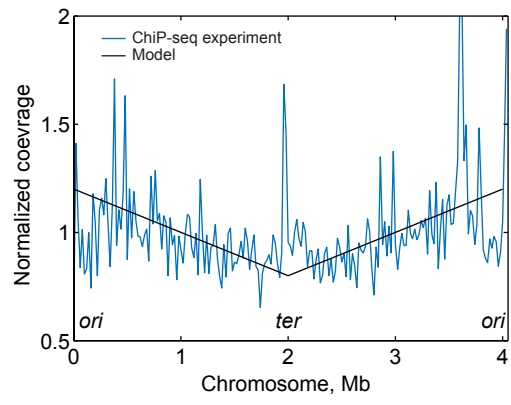

**Figure S11**



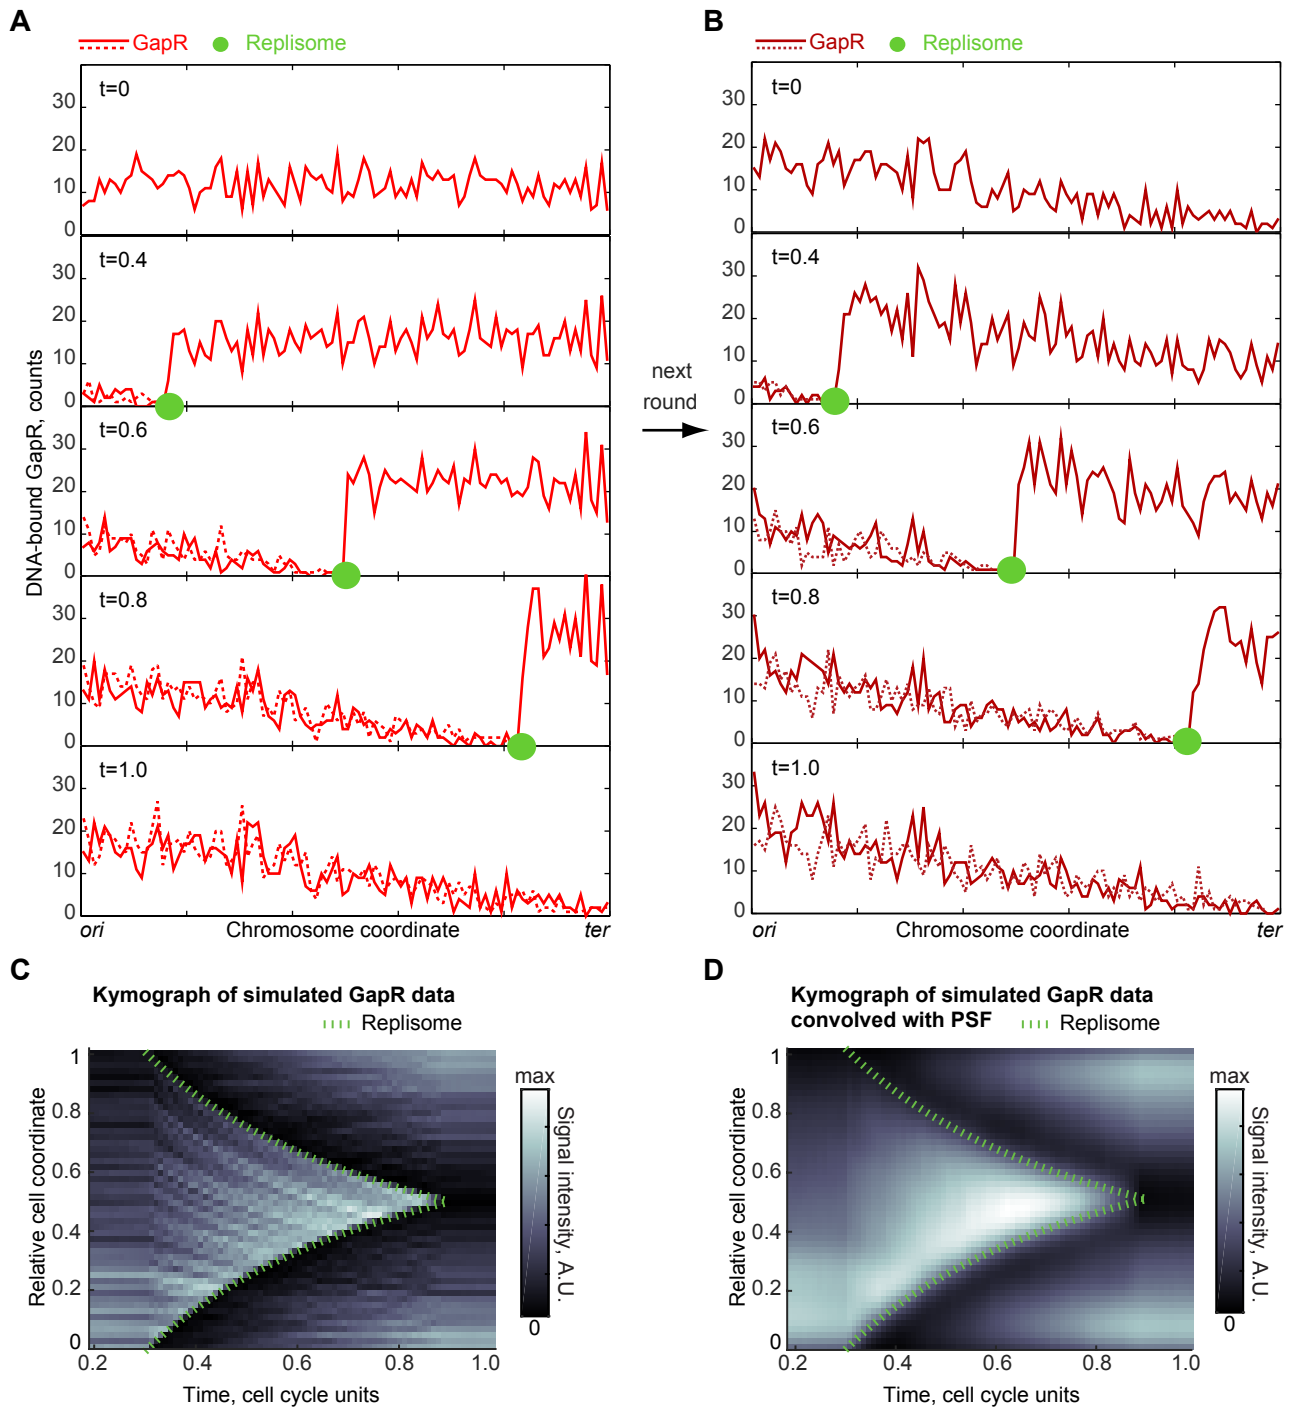

Figure S12

## 1 **Appendix Supplementary Methods**

2

### 3 **Media composition**

4 LB medium: 10 g/L NaCl, 5 g/L yeast extract, 10 g/L tryptone

5 M9 supplemented medium: 6 g/L Na<sub>2</sub>HPO<sub>4</sub>·7H<sub>2</sub>O, 3 g/L KH<sub>2</sub>PO<sub>4</sub>, 0.5 g/L NaCl, 1 g/L NH<sub>4</sub>Cl, 2  
6 mM MgSO<sub>4</sub>, 1 µg/L thiamine supplemented with 0.1% casamino acids and 0.2% glucose

7 PYE medium: 2 g/L bacto-peptone, 1 g/L yeast extract, 1 mM MgSO<sub>4</sub>, 0.5 mM CaCl<sub>2</sub>

8 M2G minimal medium: 0.87 g/L Na<sub>2</sub>HPO<sub>4</sub>, 0.54 g/L KH<sub>2</sub>PO<sub>4</sub>, 0.50 g/L NH<sub>4</sub>Cl, 0.2% (w/v)

9 glucose, 0.5 mM MgSO<sub>4</sub>, 0.5 mM CaCl<sub>2</sub>, 0.01 mM FeSO<sub>4</sub>

10

### 11 **Buffers composition**

12 EMSA buffer: 10 mM Tris-HCl pH 7.6, 1 mM MgCl<sub>2</sub>, 0.5 mM EDTA, 0.5 mM DTT, 50 mM NaCl,  
13 4% glycerol and 0.5 mg/mL poly(dI-dC)•poly(dI-dC)

14 TBE buffer: 10.7878 g/L Tris base, 5.55 g/L boric acid, 744 g/L disodium EDTA•2H<sub>2</sub>O pH 8.3

15 Blocking buffer: TBS with 5% Non-fat milk and 0.05% Tween 20

16

### 17 **Immunoblotting**

18 Cultures of *C. crescentus* were grown up to OD<sub>660nm</sub> ≈ 0.4 and synchronized as reported  
19 previously (Evinger and Agabian, 1977), and isolated swarmer cells were resuspended in pre-  
20 warmed M2G to an approximate OD<sub>660nm</sub> ≈ 0.2. At 15 min intervals, OD<sub>660nm</sub> measurements  
21 were recorded, and 1 mL samples were pelleted and frozen at -80°C until future use. For  
22 preparation of cell lysates, pellets were resuspended in 50 mM Tris-HCl, 2% SDS, and  
23 normalized by recorded OD<sub>660nm</sub> measurements. Lysates were separated on an SDS  
24 polyacrylamide gel and proteins were transferred to a nitrocellulose membrane. The membrane  
25 was first incubated in Blocking buffer for 1 h (same buffer was used in following steps, unless  
26 stated otherwise) and probed with a 1:10,000 dilution of anti-CtrA (Quon et al., 1996) for another  
27 hour, and a 1:10,000 dilution of secondary anti-rabbit HRP (BioRad). The membrane was then  
28 stripped using 100 mM β-mercaptoethanol, 2% SDS, 62.5 mM Tris-HCl, pH 6.7, and washed.  
29 Next, the membrane was probed with a 1:2,000 dilution of anti-MreB (Figge et al., 2004), and a  
30 1:10,000 dilution of secondary anti-rabbit HRP (BioRad). The membrane was again stripped  
31 and probed for GapR-Venus using a 1:1,000 dilution of anti-GFP JL-8 Living Colors® Av  
32 Monoclonal Antibody (Clontech Laboratories, Mountain View, CA), and a 1:10,000 dilution of  
33 secondary anti-mouse HRP (BioRad). At each step after incubation with a secondary HRP  
34 antibody, the membrane was incubated with Amersham ECL Prime Western Blotting Detection

35 Reagent (GE Healthcare Bio-Sciences, Pittsburgh, PA) and signals were detected on a Kodak  
36 film (Carestream Health) or on an Amersham Imager 600 (GE Healthcare Bio-Sciences).

37

### 38 **Protein purification**

39 The recombinant plasmid for expression of His-tagged GapR was transformed into the *E. coli*  
40 strain BL21 (DE3), resulting in strain CJW5785. Cultures from a fresh transformation were  
41 grown in 0.5 L of M9 supplemented with 0.2% glycerol and 100 µg/mL kanamycin at 37°C until  
42 the culture reached an  $OD_{660nm} \approx 0.4$  and then synthesis of His-GapR was induced with 0.5 mM  
43 IPTG at 25°C for 3 h. Cells were harvested by centrifugation (6,500 x g) and pellets were  
44 washed twice with 20 mM MOPS pH 7.2 buffer and frozen at -80°C. Pellets were resuspended  
45 in Buffer A (20 mM Tris-HCl, 400 mM NaCl, 10% glycerol pH 7.6) supplemented with 60 U  
46 DNase I (Thermo Fisher Scientific, Waltham MA) and incubated at room temperature for 10  
47 min. Cell wall was partially degraded using 7.5 kU Ready-Lyse Lysozyme (Epicenter  
48 Biotechnologies, Madison WI) and incubated at room temperature for 5 min. One tablet of  
49 Protease Inhibitor Cocktail (Roche, Basel Switzerland) was added and the mixture was further  
50 incubated at 37°C for 10 min. Cell disruption and DNA cleavage were achieved by sonication  
51 using a Digital Sonifier<sup>®</sup> S-250D with (Branson Sonic Power Co, Danbury CT) with the 1/8"  
52 microtip: output 45%, 11-13 cycles 20" ON/40" OFF on ice. Cell debris was removed by  
53 centrifugation at 100,000 x g for 1 h 30 min at 4°C. Further steps were performed using an  
54 ÄKTA<sup>™</sup>-FPLC system (GE Healthcare Life Sciences) equipped with a Monitor UPC-900 with  
55 fixed absorbance at 280 nm and using the manufacturer's chromatographic filtration devices.  
56 The cleared supernatant was injected into a 1 mL His-Trap HP<sup>™</sup> Ni-sepharose column,  
57 previously equilibrated in Buffer A. A step-wise elution of the protein was performed with Buffer  
58 B (20mM Tris-HCl, 400 mM NaCl, 10% glycerol, 500 mM imidazole pH 7.6). After evaluation  
59 with Coomassie Blue staining on polyacrylamide gels, the His-GapR fractions with the highest  
60 purity were pooled and the NaCl concentration was reduced to ~10mM by dialysis against  
61 Buffer Aq (20 mM Tris-HCl, 10% glycerol pH 8.0) at 4°C for at least 4 h using a Slide-A-Lyzer<sup>™</sup>  
62 cassette with MWCO = 10 kDa (Thermo Fisher Scientific). Higher purity was achieved by further  
63 purification using an anion-exchange MonoQ<sup>™</sup> 5/50 GL chromatography column in a linear  
64 gradient from 50 mM to 1M NaCl generated by mixing Buffer Aq and Buffer Bq (20mM Tris-HCl,  
65 10% glycerol, 1M NaCl pH 8.0). Protein purity was again evaluated by Coomassie Blue staining  
66 and DNA contamination was verified by ratio absorbance at 260/280nm in a Nanodrop device  
67 (Thermo Fisher Scientific) and ethidium bromide staining in an agarose gel. Fractions with no  
68 DNA and with highest purity (~98%) were pooled, concentrated using an Amicon Ultra-14

69 MWCO = 10 kDa (EMD Millipore, Darmstadt Germany) and dialyzed 1:1,000 overnight against  
70 Buffer Aq. Protein concentration was determined at this step with Pierce™ BCA Protein Assay  
71 Kit (Thermo Fisher Scientific). Removal of the polyHis-tag was achieved by digestion with Turbo  
72 TEV protease (Eton Bioscience Inc., San Diego CA) overnight at 16°C according to the  
73 manufacturer's recommendations. The cleavage efficiency was approximately 90–95%. The  
74 sample was dialyzed against buffer Bq overnight at 4°C, and stored in small aliquots at –80°C  
75 or kept at 4°C for immediate use.

76

### 77 **Library preparation, sequencing and analysis for RNA-seq experiments**

78 External RNA standard controls were performed by adding 1 µl of a 1:100 dilution of ERCC  
79 ExFold RNA Spike-In Mix (Thermo Fisher Scientific) per 1 µg of extracted RNA prior removal of  
80 rRNA. Library preparation and removals of rRNA were both achieved using the ScriptSeq  
81 Complete Kit Bacteria (Illumina®, San Diego CA) following the manufacturer's protocols.  
82 Libraries were sequenced using HiSeq2500 (1x50bp) to generate more than 10M reads per  
83 sample. The sequence data from each sample was aligned to the *C. crescentus* NA1000  
84 reference genome CP001340.1 using STAR (Dobin et al., 2013). Gene quantification and  
85 differential gene expression analysis was performed using featureCounts (Liao et al., 2014) and  
86 DESeq2 (Love et al., 2014), respectively.

87

### 88 **Library preparation and sequencing for Chromatin Immunoprecipitation (ChIP-seq)** 89 **experiments**

90 Library preparation and sequencing was performed by the Yale Center for Genome Analysis as  
91 follows: ~10 ng of immunoprecipitated DNA was evaluated with a 2100 Bioanalyzer (Agilent  
92 Technologies, Santa Clara CA) using a high sensitivity Quant-iT™ DNA Assay Kit (Thermo  
93 Fisher Scientific). ChIP-DNA was further purified using Ampure XP SPRI beads (Beckman  
94 Coulter Genomics). The DNA was then end-repaired, A-tailed, adapter ligated, and enriched  
95 with 10 PCR cycles. Indexed libraries that met the appropriate cut-offs were quantified by  
96 quantitative real-time PCR and insert size distribution was determined with the LabChip® GX  
97 (Perkin Elmer, Waltham, MA). Samples with a yield  $\geq 0.5$  ng/µl and ~300bp were used for  
98 sequencing. Subsequently, sample concentrations were normalized to 10 nM and loaded into  
99 Illumina Rapid or High-output flow cells (Illumina®, San Diego CA) at a concentration that  
100 yielded 150-250 million passing filter clusters per lane. Samples were sequenced using 75 bp  
101 single or paired-end sequencing on an Illumina HiSeq 2500 according to Illumina protocols. The  
102 6 bp index was read during an additional sequencing read that automatically followed the

103 completion of read 1. A positive control (prepared bacteriophage Phi X library) provided by  
104 Illumina was spiked into every lane at a concentration of 0.3% to monitor sequencing quality in  
105 real time.

106

### 107 **ChIP-seq data analysis**

108 Reads obtained from sequencing were trimmed using the FastX Trimmer of the FastX-toolkit  
109 software package, and aligned to the *C. crescentus* NA1000 reference genome CP001340.1  
110 using the BWA-MEM software (Li and Durbin, 2009). Statistically significant enriched genomic  
111 regions were determined with MACS2 (Zhang et al., 2008) with pairwise alignment files of total  
112 DNA before ChIP as “control” and immunoprecipitated GapR-Venus DNA as “treatment” for  
113 each sample. Peaks were detected with flags --extsize 147, --nomodel, and --gsize 4e6. We  
114 further used the genomeCoverageBed function from the bedtools suite (Quinlan and Hall, 2010)  
115 to determine the per-base coverage from the alignment files used for peak detection. The raw  
116 coverage numbers were normalized to number of millions of mapped reads. Downstream  
117 analysis was done using MATLAB software. Sequencing results are available under Gene  
118 Expression Omnibus (GEO) accession number, GSE85344. Circular schemes for normalized  
119 coverage reads were generated with R (“The Comprehensive R Archive Network,” CRAN.),  
120 CIRCOS (Krzywinski et al., 2009) or MATLAB software with 10 kb sliding average window.

121

### 122 **Motif discovery with MEME**

123 One hundred nucleotide-long sequences centered on the ChIP-Seq peaks detected by MACS2  
124 were fed into MEME (Machanick and Bailey, 2011). MEME was run locally via the Tmod  
125 Toolbox (Sun et al., 2010) with the following parameters: 1 motif to find, motif width set to 15,  
126 background Markov model of length 2 based on *C. crescentus* NA1000 genome sequence and  
127 allowing sites on both DNA strands (-revcomp set to TRUE). AT-rich motifs were found  
128 regardless of the value of the motif length parameter (value range tested: 10 to 30). We also  
129 tested the robustness of the ET-rich motif discovery by changing the length of the Markov model  
130 up to 4 and by thresholding the input sequences using the peak quality score returned by  
131 MACS2. In both cases, increasing the stringency (long Markov model and stringent q-value  
132 threshold) led to a similar motif.

133

### 134 **Whole genome sequencing**

135 Genomic DNA (gDNA) was extracted using a ChargeSwitch Kit® (Thermo Fisher Scientific)  
136 following the manufacturer’s protocol from exponential ( $OD_{660nm} < 0.275$ ) cultures of wild-type

137 (NA1000) or a  $\Delta gapR::oxy$  strain (CJW5747) grown in M2G or PYE media at 25°C. After elution,  
138 gDNA quality and concentration was assessed by measurement of the A260/A280 and  
139 A260/A230 ratios with a Nanodrop device (Thermo Fisher Scientific) and ethidium bromide  
140 staining in agarose gel. gDNA integrity and size was evaluated by running an Agilent  
141 Bioanalyzer gel prior to library preparation. Library preparation and sequencing was performed  
142 by the Yale Center for Genome Analysis as follows: ~500ng of gDNA with size 10-20 Kb was  
143 sheared using a Covaris E210 (Covaris®, Woburn, MA) and further purified using Ampure XP  
144 SPRI beads (Beckman Coulter Genomics). The DNA was then end-repaired, A-tailed, adapter  
145 ligated and enriched with 5 PCR cycles. Indexed libraries were that met appropriate cut-offs  
146 were quantified by quantitative real-time PCR and insert size distribution was determined with  
147 the LabChip® GX (Perkin Elmer, Waltham, MA). Samples with a yield of  $\geq 0.5$  ng/ $\mu$ l were used  
148 for sequencing. Subsequently, sample concentrations were normalized to 2 nM and loaded into  
149 High-output flow cells (Illumina®, San Diego CA) at a concentration that yields ~200 million  
150 passing filter clusters per lane. Samples were sequenced using 75 bp paired-end sequencing  
151 on an Illumina HiSeq 2500 according to Illumina protocols. The 6 bp index was read during an  
152 additional sequencing read that automatically followed the completion of read 1. A positive  
153 control (prepared bacteriophage Phi X library) provided by Illumina was spiked into every lane at  
154 a concentration of 0.3% to monitor sequencing quality in real time. Reads obtained from  
155 sequencing were trimmed and aligned to the *C. crescentus* NA1000 reference genome  
156 CP001340.1 using the Bowtie software (Li and Durbin, 2009). Downstream analysis was done  
157 with MATLAB software. Whole Genome sequencing results are available under Sequence Read  
158 Archive (SRA) with the ID: SRP081124.

159

### 160 **Calculation of the organization factor**

161 The organization factor measures how much entropy a probability distribution can gain before  
162 reaching its theoretical maximum entropy, which is given by the entropy of its corresponding  
163 uniform distribution. Signals went through several pre-processing steps before organization  
164 factor calculation. Oufiti cellList signals of DnaN-CFP or DnaN-mCherry were oriented and  
165 computationally synchronized at the single-cell level according to DnaN dynamics (to reduce  
166 cell-to-cell variability). Orientation was performed by identifying the cell pole closest to the  
167 initially formed replisome. Single-cell time series were aligned in time with the time-shift  $\tau$  that  
168 maximized the cross-correlation

$$\langle (X_t - \langle X \rangle)(Y_{t+\tau} - \langle Y \rangle) \rangle / \sigma_X \sigma_Y$$

169 over all times  $t$ , where  $X$  is a time series of DnaN signals selected to be a seed for alignment,  
170 and  $Y$  is the DnaN time series to be aligned,  $X_t$  is a single-time column from  $X$ ,  $\langle X \rangle$  is the mean  
171 value of  $X$ , and  $\sigma_X$  is the standard deviation of  $X$ . The organization factor of a computationally  
172 synchronized signal was calculated after additional normalization: polar regions were excluded,  
173 the signal was normalized by the area of the mesh segment that it was measured under to  
174 obtain signal concentration,  $C$ , along the cell length, and  $C$  was normalized by setting its integral  
175 to 1.

176

177 The organization factor of a single signal was then calculated as

178

$$-\log_2 1/\ell + \sum C \log_2 C$$

179 where  $\ell$  is the length of  $C$ .

180 The related code is available in ComputerCodeEV1C

181

## 182 **Phylogenetic tree construction**

183 NCBI-retrieved sequences of GapR protein homologs were selected based on representative  $\alpha$ -  
184 proteobacteria 16S rDNA phylogeny trees (Georgiades et al., 2011; Williams et al., 2007) and  
185 complemented with protein sequences of homologs found in other bacterial phyla,  $\alpha$ -  
186 proteobacteria-related phages, archaea and eukarya. Protein sequence alignment was done with  
187 MUSCLE (Edgar, 2004) using default parameters. The phylogenetic tree of DUF2312 was made  
188 using Genious version 8.1.5 (Kearse et al., 2012) with the Jukes-Cantor genetic distance  
189 method and CCNA\_03907 (a protein with the highest structural similarity to GapR homologs but  
190 not part of the DUF2312 family) as the outgroup. Virus labels include both the viral names and  
191 the host species.

192

193

**Table S1. Strains and plasmids used in this study**

| Name                                | Relevant genotype or description                                                                              | Reference or source            |
|-------------------------------------|---------------------------------------------------------------------------------------------------------------|--------------------------------|
| <b><i>C. crescentus</i> strains</b> |                                                                                                               |                                |
| CJW1407                             | CB15N $\Delta tipN$                                                                                           | (Lam et al., 2006)             |
| CJW1550                             | CB15N <i>vanA</i> ::pNJH17 ( <i>ftsZ-mcherry</i> )                                                            | (Aaron et al., 2007)           |
| CJW2053                             | CB15N $\Delta tipN$ ::pHL231kbTipNGFP                                                                         | Whitman Schofield, unpublished |
| CJW3611                             | CB15N <i>tipN</i> ::pCFPC4- <i>tipN</i> '                                                                     | Whitman Schofield, unpublished |
| CJW4678                             | CB15N <i>dnaN</i> ::pCHYC1- <i>dnaN</i> '                                                                     | Geraldine Laloux, unpublished  |
| CJW4681                             | CB15N <i>dnaN</i> ::pCFPC1- <i>dnaN</i> '                                                                     | G. Laloux, unpublished         |
| CJW5534                             | CB15N <i>gapR</i> :: <i>gapR-venus</i>                                                                        | This work                      |
| CJW5535                             | CB15N <i>gapR</i> :: <i>gapR-venus vanA</i> ::pVCFPC2- <i>ftsZ</i>                                            | This work                      |
| CJW5537                             | CB15N <i>gapR</i> :: <i>gapR-venus dnaN</i> ::pCHYC1- <i>dnaN</i> '                                           | This work                      |
| CJW5594                             | CB15N <i>gapR</i> :: <i>gapR-venus dnaN</i> ::pCFPC1- <i>dnaN</i> ' <i>vanA</i> ::pNJH17                      | This work                      |
| CJW5744                             | CB15N <i>xyIX</i> ::pXVENC4- <i>gapRp-gapR dnaN</i> ::pCHYC1- <i>dnaN</i> '                                   | This work                      |
| CJW5747                             | CB15N $\Delta gapR$ :: <i>oxy</i>                                                                             | This work                      |
| CJW5753                             | CB15N <i>bla6 rsaA2 pGZ2 xyIX</i> ::pXVENC4- <i>gapRp-gapR</i>                                                | This work                      |
| CJW5775                             | CB15N <i>bla6 rsaA2 pGZ2 xyIX</i> :: pXVENC4- <i>gapRp-gapR dnaN</i> ::pCFPC1- <i>dnaN</i> '                  | This work                      |
| CJW5776                             | CB15N <i>xyIX</i> ::pXVENC4- <i>gapRp-gapR</i>                                                                | This work                      |
| CJW5777                             | CB15N $\Delta gapR$ :: <i>oxy xyIX</i> ::pXVENC4- <i>gapRp-gapR</i>                                           | This work                      |
| CJW5781                             | CB15N <i>xyIX</i> :: pXCHYC4- <i>gapRp-gapR</i>                                                               | This work                      |
| CJW5789                             | CB15N / pRXCMS2                                                                                               | This work                      |
| CJW5791                             | CB15N / pRMCS2- <i>gapRp-gapR</i>                                                                             | This work                      |
| CJW5795                             | CB15 <i>divD308</i> (Ts)::pDW110( <i>parEp</i> ), <i>divE309</i> (Ts) <i>xyIX</i> ::pVENC4- <i>gapRp-gapR</i> | This work                      |
| CJW5796                             | CB15N <i>xyIX</i> ::pXVENC4                                                                                   | This work                      |



|                        |                                                                                                                                                  |                                |
|------------------------|--------------------------------------------------------------------------------------------------------------------------------------------------|--------------------------------|
| CJW5800                | CB15N <i>xylX</i> ::pXVENC4-PgapR-gapR<br><i>dnaN</i> ::pCHYC1-dnaN' <i>tipN</i> ::pCFPC2-tipN'                                                  | This work                      |
| CJW5806                | CB15N <i>hu2</i> ::pCHYC2-hu2'                                                                                                                   | This work                      |
| CJW5808                | CB15N <i>xylX</i> ::pXVENC4-PgapR-gapR<br><i>dnaN</i> ::pCHYC1-dnaN' <i>ftsZ</i> ::pBJM1                                                         | This work                      |
| CJW5810                | CB15N <i>xylX</i> ::pXCHYC4-gapRp-gapR<br>$\Delta tipN$ ::pHL231kbTipNGFP                                                                        | This work                      |
| CJW5816                | CB15N $\Delta CCNA\_03907$ :: $\Omega$                                                                                                           | This work                      |
| CJW5825                | CB15N <i>bla6 rsaA2</i> pGZ2 <i>xylX</i> ::pXVENC4-<br>gapRp-gapR <i>tipN</i> ::pCFPC1-tipN'                                                     | This work                      |
| CJW5836                | CB15N <i>xylX</i> ::pXVENC4-gapRp-gapR<br><i>dnaN</i> ::pCFPC1-dnaN'                                                                             | This work                      |
| CJW5932                | CB15N <i>gapR</i> ::gapR-venus <i>tipN</i> ::pCFPC4-tipN'<br><i>dnaN</i> ::pCHYC1-dnaN'end                                                       | This work                      |
| CJW5960                | CB15N <i>hu2</i> ::pCHYC2-hu2' <i>tipN</i> ::pCFPC1-tipN'                                                                                        | This work                      |
| CJW5969                | CB15N <i>hu2</i> ::pCHYC2-hu2' <i>dnaN</i> ::pCFPC1-<br>dnaNend                                                                                  | This work                      |
| EG56                   | CB15N <i>vanA</i> ::pVCFPC1-ftsZ                                                                                                                 | (Goley et al., 2011)           |
| LS1                    | CB15N <i>bla6 rsaA2</i> pGZ2 integrant                                                                                                           | (Zweiger et al.,<br>1994)      |
| NA1000                 | Synchronizable variant of wild-type CB15, also<br>named NA1000 or CB15N                                                                          | (Evinger and<br>Agabian, 1977) |
| ML743                  | $\Delta recA$                                                                                                                                    | (Modell et al., 2014)          |
| ML2091                 | <i>lexA</i> <sub>K203A</sub>                                                                                                                     | (Modell et al., 2014)          |
| ML2118                 | CB15N $\Delta smc$ ::km                                                                                                                          | (Le et al., 2013)              |
| ML2120                 | CB15N $\Delta hup1$ ::sp $\Delta hup2$ ::oxy                                                                                                     | (Le et al., 2013)              |
| PC6340                 | CB15 <i>divD308</i> (Ts)::pDW110(parEp),<br><i>divE309</i> (Ts). Carrying temperature-sensitive<br>(Ts) mutations in <i>ftsA</i> and <i>parE</i> | (Ward and Newton,<br>1997)     |
| YB1585                 | CB15N <i>ftsZ</i> ::pBJM1                                                                                                                        | (Wang et al., 2001)            |
| <b>E. coli strains</b> |                                                                                                                                                  |                                |
| MG1655                 | K-12 derivative. F-, $\lambda^-$ , <i>rph-1</i>                                                                                                  | (Blattner et al.,<br>1997)     |
| BL21(DE3)              | F-, <i>lon-11</i> , $\Delta(ompT-nfrA)885$ , $\Delta(galM-$                                                                                      | (Wood, 1966)                   |

|                                 |                                                                                                                                                                                                                                                                                |                            |
|---------------------------------|--------------------------------------------------------------------------------------------------------------------------------------------------------------------------------------------------------------------------------------------------------------------------------|----------------------------|
|                                 | <i>ybhJ</i> 884, $\lambda$ DE3 [ <i>lacI</i> , <i>lacUV5-T7 gene 1</i> , <i>ind1</i> , <i>sam7</i> , <i>nin5</i> ], $\Delta$ 46, [ <i>mal</i> <sup>r</sup> ] <sub>K-12</sub> ( $\lambda$ <sup>S</sup> ), <i>hsdS10</i> .<br>Protein expression strain                          |                            |
| DH5 $\alpha$                    | F-, $\Delta$ ( <i>argF-lac</i> )169, $\phi$ 80d <i>lacZ</i> 58(M15), $\Delta$ <i>phoA8</i> , <i>glnX44</i> (AS), $\lambda$ <sup>-</sup> , <i>deoR481</i> , <i>rfbC1</i> , <i>gyrA96</i> (NalR), <i>recA1</i> , <i>endA1</i> , <i>thiE1</i> , <i>hsdR17</i> .<br>Cloning strain | Invitrogen                 |
| S17-1                           | <i>recA pro hsdR</i> RP4-2-Tc::Mu-Km::Tn7, used for conjugation                                                                                                                                                                                                                | (Simon R et al., 1984)     |
| SM10                            | F-, $\lambda$ <sup>-</sup> , <i>thr-1</i> , <i>leuB6</i> , <i>lacY1</i> , <i>supE44</i> , <i>rfbD1</i> , <i>thi-1</i> , <i>tonA21</i> , <i>recA</i> RP4 derivative integrated into the chromosome, Tet::Mu. Used for conjugation.                                              | MRK Alley, unpublished     |
| CJW5794                         | MG1655/ pBAD33-gapR-sfGFP                                                                                                                                                                                                                                                      | This work                  |
| CJW5785                         | BL21 (DE)/ pET24dHT-GapR                                                                                                                                                                                                                                                       | This work                  |
| <b>Plasmids<sup>&amp;</sup></b> |                                                                                                                                                                                                                                                                                |                            |
| pBAD33                          | Replicative vector with <i>ori</i> p15A origin and <i>cat</i> gene (Cm <sup>r</sup> ) for expression of proteins under control or arabinose promoter in <i>E.coli</i>                                                                                                          | (Guzman et al., 1995)      |
| pBAD33-gapR-sfGFP               | pBAD33 derivative for expression of <i>gapR-sfgfp</i> in <i>E. coli</i> , Cm <sup>r</sup>                                                                                                                                                                                      | This work                  |
| pBOR                            | pBluescript with $\Omega$ cassette from pHP45 $\Omega$ cloned at EcoRI site, Sp <sup>r</sup>                                                                                                                                                                                   | C. Stevens, unpublished    |
| pCFPC1 (pMT622)                 | Non-replicative plasmid in <i>C. crescentus</i> , used for generating a C-terminus CFP protein fusion expressed from chromosomal loci, Sp <sup>r</sup>                                                                                                                         | (Thanbichler et al., 2007) |
| pCFPC1-dnaN'                    | Plasmid for generating a C-terminus CFP protein fusion of DnaN expressed from the <i>dnaN</i> chromosomal locus, Sp <sup>r</sup>                                                                                                                                               | G. Laloux, unpublished     |
| pCFPC1-tipN'                    | Plasmid for generating a C-terminus CFP protein fusion of TipN expressed from the <i>tipN</i> chromosomal locus, Sp <sup>r</sup>                                                                                                                                               | This work                  |
| pCFPC2 (pMT664)                 | Non-replicative plasmid in <i>C. crescentus</i> , used for generating a C-terminus CFP protein fusion expressed from chromosomal loci, Km <sup>r</sup>                                                                                                                         | (Thanbichler et al., 2007) |
| pCFPC2-tipN'                    | Plasmid for generating a C-terminus CFP protein fusion of TipN expressed from the <i>tipN</i>                                                                                                                                                                                  | W. Schofield, unpublished  |

|                         |                                                                                                                                                                                                                                                            |                                |
|-------------------------|------------------------------------------------------------------------------------------------------------------------------------------------------------------------------------------------------------------------------------------------------------|--------------------------------|
|                         | chromosomal locus, Km <sup>r</sup>                                                                                                                                                                                                                         |                                |
| pCHYC1 (pMT625)         | Non-replicative plasmid in <i>C. crescentus</i> , used for generating a C-terminus mCherry protein fusion expressed from chromosomal loci, Sp <sup>r</sup>                                                                                                 | (Thanbichler et al., 2007)     |
| pCHYC1-dnaN'            | Plasmid for generating a C-terminus mCherry protein fusion of DnaN expressed from the <i>dnaN</i> chromosomal locus, Sp <sup>r</sup>                                                                                                                       | G. Laloux, unpublished         |
| pCHYC2                  | Non-replicative plasmid in <i>C. crescentus</i> , used for generating a C-terminus mCherry protein fusion expressed from chromosomal loci, Km <sup>r</sup>                                                                                                 | (Thanbichler et al., 2007)     |
| pCHYC2-Hu2              | Plasmid for generating a C-terminus mCherry protein fusion of <i>hu2</i> expressed from the <i>hu2</i> chromosomal locus, Km <sup>r</sup>                                                                                                                  | This work                      |
| pET24dHTcreSΔH          | Derivative of pET24dHT (gift of N. Foeger, Heidelberg, Germany to Matthew T. Cabeen). Empty plasmid was originally engineered from pET24d (Novagen) to have a His-tag and a TEV protease cleavage site upstream the NdeI site for cloning, Km <sup>r</sup> | Matthew T. Cabeen, unpublished |
| pET24dHT-GapR           | Plasmid for overproduction and purification of 6xHis-GapR, Km <sup>r</sup>                                                                                                                                                                                 | This work                      |
| pHL23                   | Cloning vector, Km <sup>r</sup>                                                                                                                                                                                                                            | (Lam et al., 2006)             |
| pHL231kbTipNGFP         | A fragment containing <i>tipN-gfp</i> was released from pKStipN-GFP by digestion with NotI and included into pHL23 carrying TipN and ~1Kb upstream the <i>tipN</i> locus.                                                                                  | W. Schofield, unpublished      |
| pIDTcc3319              | DNA sequence of <i>gapR</i> gene that has been codon-optimized for <i>E. coli</i> was cloned into a plasmid from IDT (Integrated DNA Technologies, Coralville IA), Km <sup>r</sup>                                                                         | This work                      |
| pKStipN-GFP             | pBluescript carrying <i>tipN-gfp</i>                                                                                                                                                                                                                       | (Lam et al., 2006)             |
| pNPTS138                | <i>mobRP4<sup>+</sup> sacB ColE1 ori</i> , Km <sup>r</sup>                                                                                                                                                                                                 | M.R. Alley, unpublished        |
| pNPTS138UPΩDWccna_03907 | Integrative vector for in-frame deletion of <i>CCNA_03907</i> and replacement with spectinomycin resistance (Ω) cassette, Km <sup>r</sup> , Sp <sup>r</sup>                                                                                                | This work                      |

|                     |                                                                                                                                                                    |                            |
|---------------------|--------------------------------------------------------------------------------------------------------------------------------------------------------------------|----------------------------|
| pNPTS138UPOxyDWgapR | Integrative vector for in-frame deletion of <i>gapR</i> and replacement with oxytetracycline (Oxy <sup>r</sup> ) resistance cassette, Km <sup>r</sup> ,            | This work                  |
| pNPTS138-gapR-Venus | Integrative vector for replacement of <i>gapR</i> for a <i>gapR-Venus</i> fusion at <i>gapR</i> gene locus, Km <sup>r</sup> .                                      | This work                  |
| pRXMCS2 (pMT687)    | Replicative plasmid in <i>C. crescentus</i> , used for inducible expression of genes from a low-copy number plasmid, Km <sup>r</sup>                               | (Thanbichler et al., 2007) |
| pRMCS2-gapRp-gapR   | pRXMCS2 derivative. Vector for <i>gapR</i> expression under the control of its own promoter in <i>C. crescentus</i> , Km <sup>r</sup>                              | This work                  |
| pTOPO2.1            | Cloning vector, Ap <sup>r</sup> , Km <sup>r</sup>                                                                                                                  | Thermo Fisher Scientific   |
| pXCFPC5 (pMT605)    | Non-replicative plasmid in <i>C. crescentus</i> , used for generating a C-terminus CFP protein fusion expressed at the <i>xyIX</i> locus, Tet <sup>r</sup>         | (Thanbichler et al., 2007) |
| pXCHYC4 (pMT617)    | Non-replicative plasmid in <i>C. crescentus</i> , used for generating a C-terminus Venus protein fusion expressed at the <i>xyIX</i> locus, Gn <sup>r</sup>        | (Thanbichler et al., 2007) |
| pXCHYC4-gapRp-gapR  | Plasmid for generating a C-terminus mCherry protein fusion of GapR expressed under the control of <i>gapR</i> promoter from the <i>xyIX</i> locus, Gn <sup>r</sup> | This work                  |
| pXVENC4 (pMT616)    | Non-replicative plasmid in <i>C. crescentus</i> , used for generating a C-terminus Venus protein fusion expressed at the <i>xyIX</i> locus, Gn <sup>r</sup>        | (Thanbichler et al., 2007) |
| pXVENC4-gapRp-gapR  | Plasmid for generating a C-terminus Venus protein fusion of GapR expressed under the control of <i>gapR</i> promoter from the <i>xyIX</i> locus, Gn <sup>r</sup>   | This work                  |

195 <sup>&</sup>Vector resistance: Ap<sup>r</sup>, Ampicillin, Cm<sup>r</sup>, Chloramphenicol, Gn<sup>r</sup>, Gentamicin, Km<sup>r</sup>, Kanamycin resistance,  
196 Oxy<sup>r</sup>, oxytetracycline, Sp<sup>r</sup>, Spectinomycin.

197

198

**Table S2. Construction of strains and plasmids used in this study**

| Strain or plasmid | Construction method                                                                                                                                                                                                                                                                                                                                                                                                                                                                                                                                                                                                                                                                                   |
|-------------------|-------------------------------------------------------------------------------------------------------------------------------------------------------------------------------------------------------------------------------------------------------------------------------------------------------------------------------------------------------------------------------------------------------------------------------------------------------------------------------------------------------------------------------------------------------------------------------------------------------------------------------------------------------------------------------------------------------|
| <i>Strain</i>     |                                                                                                                                                                                                                                                                                                                                                                                                                                                                                                                                                                                                                                                                                                       |
| CJW2053           | Transformation of pHL231kbTipNGFP into CJW1407.                                                                                                                                                                                                                                                                                                                                                                                                                                                                                                                                                                                                                                                       |
| CJW3611           | Transformation of pCFPC-4TipN into CB15N.                                                                                                                                                                                                                                                                                                                                                                                                                                                                                                                                                                                                                                                             |
| CJW4678           | Transformation of pCHYC1-dnaN' into CB15N.                                                                                                                                                                                                                                                                                                                                                                                                                                                                                                                                                                                                                                                            |
| CJW5534           | A strain carrying a <i>gapR-venus</i> as the only copy was created using a two-step gene disruption method and sucrose selection as described previously (Gay et al., 1985). Clones were verified by sensitivity to kanamycin. Acquisition of <i>gapR-venus</i> was verified by PCR amplification with oligomers cjw2099-cjw2102 and fluorescence microscopy.                                                                                                                                                                                                                                                                                                                                         |
| CJW5535           | An UV-inactivated $\Phi$ CR30 phage lysate carrying <i>vanA::ftsZ-CFP</i> was obtained from strain EG56 and used for transduction into CJW5534.                                                                                                                                                                                                                                                                                                                                                                                                                                                                                                                                                       |
| CJW5537           | An UV-inactivated $\Phi$ CR30 phage lysate carrying <i>dnaN::pCFPC1-dnaN'</i> was obtained from strain CJW4681 and used for transduction into CJW5534.                                                                                                                                                                                                                                                                                                                                                                                                                                                                                                                                                |
| CJW5594           | An UV-inactivated $\Phi$ CR30 phage lysate carrying <i>vanA::pNJH17</i> was obtained from strain CJW1550 and used for transduction into CJW5537.                                                                                                                                                                                                                                                                                                                                                                                                                                                                                                                                                      |
| CJW5744           | Plasmid pXVENC4-gapRp-gapR was transformed into the S17-1 strain and introduced into CJW4678 by conjugation with selection of gentamicin and nalidixic acid resistance.                                                                                                                                                                                                                                                                                                                                                                                                                                                                                                                               |
| CJW5747           | An UV-inactivated $\Phi$ CR30 phage lysate carrying $\Delta$ <i>gapR::oxy</i> was obtained from CJW5777. $\Delta$ <i>gapR::oxy</i> was transduced into CB15N by incubation of 50 to 100 $\mu$ L of UV-radiated phage lysate with 400 $\mu$ L of recipient cells. Transductants were selected on PYE agar plates containing oxytetracycline ( <i>oxy</i> ), and incubated at room temperature for 5 to 10 days. Acquisition of the $\Delta$ <i>gapR::oxy</i> deletion was verified by PCR amplification with oligomers cjw2099-cjw2102. Verification of additional mutations was performed by whole genome sequencing and analyzed against CB15N using breseq software (Deatherage and Barrick, 2014). |
| CJW5753           | Plasmid pXVENC4-gapRp-gapR was transformed into the S17-1 strain and introduced into LS1 by conjugation with selection of gentamicin and nalidixic acid resistance.                                                                                                                                                                                                                                                                                                                                                                                                                                                                                                                                   |
| CJW5775           | An UV-inactivated $\Phi$ CR30 phage lysate carrying <i>dnaN::pCFPC1-dnaN'</i>                                                                                                                                                                                                                                                                                                                                                                                                                                                                                                                                                                                                                         |

|         |                                                                                                                                                                                                                                                                                                                                                                                                                                  |
|---------|----------------------------------------------------------------------------------------------------------------------------------------------------------------------------------------------------------------------------------------------------------------------------------------------------------------------------------------------------------------------------------------------------------------------------------|
|         | was obtained from strain CJW4681 and used for transduction into CJW5753                                                                                                                                                                                                                                                                                                                                                          |
| CJW5776 | Transformation of pXVENC4-gapRp-gapR into CB15N.                                                                                                                                                                                                                                                                                                                                                                                 |
| CJW5777 | A strain carrying a deletion of <i>gapR</i> and carrying an oxytetracycline resistance cassette in its place was created using a two-step gene disruption method and sucrose selection, as described previously (Gay et al., 1985). Clones were selected by sensitivity for kanamycin and resistance to oxytetracycline. Acquisition of the $\Delta gapR::oxy$ was verified by PCR amplification with oligomers cjw2099-cjw2102. |
| CJW5789 | Transformation of pRXMCS2 into CB15N                                                                                                                                                                                                                                                                                                                                                                                             |
| CJW5791 | Transformation of pRMCS2-gapRp-gapR into CB15N                                                                                                                                                                                                                                                                                                                                                                                   |
| CJW5794 | Transformation of pBAD33-gapR-sfGFP into MG1655                                                                                                                                                                                                                                                                                                                                                                                  |
| CJW5795 | Plasmid pXVENC4-gapRp-gapR was transformed into the S17-1 strain and introduced into strain PC6340 by conjugation with selection of gentamicin, nalidixic acid resistance and growth at room temperature.                                                                                                                                                                                                                        |
| CJW5796 | Transformation of pXVENC4 into CB15N                                                                                                                                                                                                                                                                                                                                                                                             |
| CJW5800 | Plasmid pCFPC2-tipN' was transformed into the S17-1 strain, and introduced into CJW5744 by conjugation with selection of kanamycin and nalidixic acid resistance.                                                                                                                                                                                                                                                                |
| CJW5806 | Transformation of pCHYC2-Hu2 into CB15N                                                                                                                                                                                                                                                                                                                                                                                          |
| CJW5808 | An UV-inactivated $\Phi$ CR30 phage lysate carrying <i>ftsZ::pBJM1</i> was obtained from using strain YB1585. <i>ftsZ::pBJM1</i> was transduced into CB15N and transductants were selected on PYE kanamycin plate containing xylose 0.3% at 30°C.                                                                                                                                                                                |
| CJW5810 | Transformatin of pXCHYC4-gapRp-gapR into CJW2053.                                                                                                                                                                                                                                                                                                                                                                                |
| CJW5816 | Plasmid CJW5817 was electroporated into CB15N. Deletion of <i>ccna_03907</i> was made using a gene disruption method and sucrose selection, as described previously (Gay et al., 1985). Clones were selected by sensitivity for kanamycin and resistance to spectinomycin and verified by PCR using oligomers cjw2618-cjw2619.                                                                                                   |
| CJW5825 | Plasmid pCFPC1-tipN' was transformed into the SM10 strain and introduced into CJW5753 by selection of spectinomycin and nalidixic acid resistance.                                                                                                                                                                                                                                                                               |
| CJW5836 | An UV-inactivated $\Phi$ CR30 phage lysate carrying <i>dnaN::pCFPC1-dnaN'</i> was obtained from strain CJW4681 and used for transduction into CJW5776.                                                                                                                                                                                                                                                                           |

|                       |                                                                                                                                                                                                                                                                                                                                                                                                                                  |
|-----------------------|----------------------------------------------------------------------------------------------------------------------------------------------------------------------------------------------------------------------------------------------------------------------------------------------------------------------------------------------------------------------------------------------------------------------------------|
| CJW5932               | An UV-inactivated $\Phi$ CR30 phage lysate carrying <i>tipN</i> ::pCFPC4- <i>tipN</i> ' was obtained from strain CJW3611 and used for transduction into CJW5534. Subsequently, the <i>dnaN</i> ::pCHYC1- <i>dnaN</i> ' fusion was introduced in the resulting strain by transduction using an UV-inactivated $\Phi$ CR30 phage lysate from strain CJW4678.                                                                       |
| CJW5960               | Plasmid pCFPC1- <i>tipN</i> ' was transformed into the SM10 strain, and introduced into CJW5806 by conjugation with selection of spectinomycin and nalidixic acid resistance.                                                                                                                                                                                                                                                    |
| CJW5969               | An UV-inactivated $\Phi$ CR30 phage lysate carrying <i>dnaN</i> ::pCHYC1- <i>dnaN</i> ' was obtained from strain CJW4681 and used for transduction into strain CJW5824                                                                                                                                                                                                                                                           |
| <i>Plasmid*</i>       |                                                                                                                                                                                                                                                                                                                                                                                                                                  |
| pBAD33-gapR-sfGFP     | The <i>gapR</i> gene was PCR amplified using oligomers cjl2325-cjl2326 and the superfolderGFP (sfGFP) was PCR amplified with oligomers cjl2327-cjl2328 from <i>E. coli</i> codon-optimized templates. Both fragments were introduced into a previously digested pBAD33 via Gibson* assembly at the NdeI and HindIII restriction sites. Incorporation of the fragment into this region of the plasmid was verified by sequencing. |
| pCFPC1- <i>dnaN</i> ' | The 3' end of <i>dnaN</i> was amplified using oligomers cjl1822-cjl1823 from a CB15N genomic DNA template. PCR product was digested with KpnI and NdeI, and ligated into pCFPC1 previously digested with the same restriction enzymes. Plasmid was verified by sequencing.                                                                                                                                                       |
| pCFPC1- <i>tipN</i> ' | The 3' end of <i>tipN</i> fragment was released from plasmid pCFPC2- <i>tipN</i> ' by digestion with Sall and KpnI into pMT622 previously digested with the same restriction enzymes.                                                                                                                                                                                                                                            |
| pCFPC2- <i>tipN</i> ' | The 3' end of <i>tipN</i> was amplified using oligomers cjl1205-cjl1206 from a CB15N genomic DNA template, and introduced in a pTOPO2.1 vector. The resulting plasmid was verified by sequencing. A <i>tipN</i> fragment was released with Sall and KpnI from the plasmid, and ligated into pCFPC2 previously digested with the same restriction enzymes.                                                                        |
| pCFPC4- <i>tipN</i> ' | The 3' end of <i>tipN</i> was amplified using oligomers cjl1205-cjl1206 from a CB15N genomic DNA template, and introduced in a pTOPO2.1 vector. The resulting plasmid was verified by sequencing. A <i>tipN</i> fragment was released with Sall and KpnI from the plasmid, and ligated into pCFPC4 previously digested with the same restriction enzymes.                                                                        |

|                             |                                                                                                                                                                                                                                                                                                                                                                                                                                                                                                                                                                                                                                                                            |
|-----------------------------|----------------------------------------------------------------------------------------------------------------------------------------------------------------------------------------------------------------------------------------------------------------------------------------------------------------------------------------------------------------------------------------------------------------------------------------------------------------------------------------------------------------------------------------------------------------------------------------------------------------------------------------------------------------------------|
| pCHYC1-dnaN'                | The 3' end of <i>dnaN</i> was amplified using oligomers cjw1822-cjw1823 from a CB15N genomic DNA template. PCR product was digested with KpnI and NdeI, and ligated into pCHYC1 previously digested with the same restriction enzymes. Plasmid was verified by sequencing.                                                                                                                                                                                                                                                                                                                                                                                                 |
| pCHYC2-Hu2'                 | The 3' end of <i>hu2</i> was amplified using oligomers cjw2768-cjw2769 from a CB15N genomic DNA template. PCR product was digested with KpnI and NdeI, and ligated into pCHYC2 previously digested with the same restriction enzymes. Plasmid was verified by sequencing.                                                                                                                                                                                                                                                                                                                                                                                                  |
| pET24dHT-GapR               | The <i>gapR</i> gene was PCR amplified with oligomers cjw2329-cjw2330 from plasmid pDTCc3319 used as template. The PCR product was digested with NdeI and HindIII and ligated into pET24dHTcreSDH previously digested with the same restriction enzymes and extracted from gel. Clones were verified by sequencing.                                                                                                                                                                                                                                                                                                                                                        |
| pNPTS138UPΩDW<br>ccna_03907 | The 1 Kb upstream of the <i>CCNA_03907</i> region (UP) including the beginning of the gene was PCR amplified with oligomers cjw2614-cjw2651 and the 1 Kb downstream region of <i>CCNA_03907</i> starting at the very end of the gene (DW) was also PCR amplified using oligomers cjw2652-cjw2653. CB15N genomic DNA was the template. The PCR products and the spectinomycin (Ω) cassette (obtained by amplification from pBOR with oligomers cjw2746-cjw2747) were introduced into a pNPTS138 plasmid via Gibson* assembly at the HindIII and NheI restriction sites. Incorporation of the fragment into this region of the plasmid was verified by sequencing.           |
| pNPTS138UPoxyDWgapR         | The 1 Kb upstream of the <i>gapR</i> region (UP) including the beginning of the gene was PCR amplified with oligomers cjw2099-cjw2173 and the 1 Kb downstream region of <i>gapR</i> starting at the very end of the gene (DW) was also PCR amplified using oligomers cjw2102-cjw2174. CB15N genomic DNA was used as a template. The PCR products and the oxytetracycline resistance cassette (obtained by amplification from pXCFPC5 with oligomers cjw2748 and cjw2749) were introduced into a pNPTS138 plasmid via Gibson* assembly at the HindIII and NheI restriction sites. Incorporation of the fragment into this region of the plasmid was verified by sequencing. |
| pNPTS138-gapR-Venus         | The 1 Kb upstream of the <i>gapR</i> region (UP) including the very beginning of the gene was PCR amplified with oligomers cjw2099-cjw2179 and the 1 Kb downstream region of <i>gapR</i> starting at the very end of the gene (DW) was also PCR amplified using oligomers                                                                                                                                                                                                                                                                                                                                                                                                  |



|                    |                                                                                                                                                                                                                                                                                                                                                                                                                                                                                                                                                                                                        |
|--------------------|--------------------------------------------------------------------------------------------------------------------------------------------------------------------------------------------------------------------------------------------------------------------------------------------------------------------------------------------------------------------------------------------------------------------------------------------------------------------------------------------------------------------------------------------------------------------------------------------------------|
|                    | <p>cjw2102-cjw2151. CB15N genomic DNA was the template. The <i>gapR-venus</i> gene fusion was PCR amplified using genomic DNA from strain CJW5776 with oligomers cjw2148-cjw2149. These PCR products were introduced into a pNPTS138 via Gibson* assembly at the HindIII and NheI restriction sites. Incorporation of the fragment into this region of the plasmid was verified by sequencing.</p>                                                                                                                                                                                                     |
| pRMCS2-gapRp-gapR  | <p>A fragment including the region between the promoter of <i>gapR</i> (<i>gapRp</i>) and the end of the <i>gapR</i> gene was PCR amplified with oligomers cjw2424-cjw2425 from a CB15N genomic DNA template. The amplified fragment was introduced via Gibson* assembly protocol into a previously PCR amplified pMT687 using oligomers cjw2426-cjw2427 (to remove the <i>xyIX</i> promoter (<i>xyIXp</i>)). Incorporation of the fragment into the region downstream the NcoI restriction site of <i>xyIXp</i> and upstream the NheI restriction site of the plasmid was verified by sequencing.</p> |
| pXVENC4-gapRp-gapR | <p>A fragment including the region between the <i>gapR</i> promoter and the end of the <i>gapR</i> gene was PCR amplified with oligomers cjw2105-cjw2106 from a CB15N genomic DNA template. The amplified fragment was introduced via Gibson* assembly protocol into a previously PCR amplified pXVENC4 using oligomers cjw2033-cjw1863 (to remove the <i>xyIX</i> promoter). Incorporation of the fragment into the region downstream the NcoI restriction site of the <i>xyIX promoter</i> and upstream the NheI restriction site of the plasmid was verified by sequencing.</p>                     |
| pXCHYC4-gapRp-gapR | <p>A fragment including the region between the <i>gapR</i> promoter and the end of the <i>gapR</i> gene was PCR amplified with oligomers cjw2105-cjw2106 from a CB15N genomic DNA template. The amplified fragment was introduced via Gibson* assembly protocol into a previously PCR amplified pXCHYC4 using oligomers cjw2033-cjw1863 (to remove the <i>xyIX</i> promoter). Incorporation of the fragment into the region downstream the NcoI restriction site of the <i>xyIX promoter</i> and upstream the NheI restriction site of the plasmid was verified by sequencing.</p>                     |

\*Procedure for the Gibson assembly protocol was adapted from Gibson DG et al (Gibson et al., 2009).

200  
201  
202  
203  
204

**Table S3. List of oligonucleotides used in this study**

| Oligonucleotide | Sequence                                                   |
|-----------------|------------------------------------------------------------|
| <i>Cloning</i>  |                                                            |
| cjw1205         | CCCCCATATGAAGCCTAAGAAGCGCCAACC                             |
| cjw1206         | CCCCGGTACCGGCCAGATCGCCGCTCGCCG                             |
| cjw1221         | TCCCCGCGGGACCTTCGGTCTTCCACAAA                              |
| cjw1222         | AGACTGCGACAGGGTCTCC                                        |
| cjw1822         | CCCCCATATGCCGAGGGCGCGGTCGGCATC                             |
| cjw1822         | CCCCCATATGCCGAGGGCGCGGTCGGCATC                             |
| cjw1823         | AAAAGGTACCGACCCGACGGCATCAGCAC                              |
| cjw1823         | AAAAGGTACCGACCCGACGGCATCAGCAC                              |
| cjw1863         | GGTACCTTAAGATCTCGAGC                                       |
| cjw2033         | CCATGGCCCCGCGCCAGTTCCGCCT                                  |
| cjw2099         | GTGCAATTGAAGCCGGCTGGCGCCAAGCTTCGGGTGAAGTTCCCGCCCTGCGCCG    |
| cjw2100         | TCCACTAGTTCTAGAGCGGCCATGGGGGCGTCTCGCGAAAAGGCAG             |
| cjw2101         | TTGCTCAATCAATCACCGGATAGGTTTTTCAGCGTGCGTCGGCGC              |
| cjw2102         | CATCCGGAGACGCGTACAGGCCGAAGCTAGCGATAGGCGGACTCCACCGGTGATCC   |
| cjw2103         | ATCACTTTACCGACCCGGCC                                       |
| cjw2104         | AAACTCACCCCTCCATTCGG                                       |
| cjw2105         | GCGGAACTGGGCGCGGGCCATGGGCGAGGATCGGTCGGCCAGACGCGG           |
| cjw2106         | GCTCGAGATCTTAAGGTACCGATCTCGCCGATCGCCGACAGATAG              |
| cjw2148         | CTGCCTTTCGCGAGACGCCCCCATG                                  |
| cjw2149         | CACGCGCCGACGCACGCTGAAAAACTTACTTTGTACAGCTCGTCCATGCCG        |
| cjw2151         | GTTTTTCAGCGTGCGTCGGCGCGTG                                  |
| cjw2173         | ATTCTTGAAGACGAAAAGGGCCTCGCATGGGGGCGTCTCGCGAAAAGGCAG        |
| cjw2174         | GTCCAAGCCTCACGGCCGCGCTCGTAGGTTTTTCAGCGTGCGTCGGCGC          |
| cjw2179         | CATGGGGGCGTCTCGCGAAAAGGCAG                                 |
| cjw2325         | GCTAGCGAATTCGAGCTCGGTACCGAAGGAGGGCCATATGGCCGACGACGCCATTTCC |
| cjw2326         | GGTGGCCGACCGGTGACCGGTAATTTACCAATTGCCGACAGATAC              |
| cjw2327         | ACGCGTCACCGGTGCGCCACCATGTCAAAAAGGCGAAGAAGCTTTTT            |
| cjw2328         | CTCATCCGCCAAAAACAGCCAAGCTTTTTATTTATACAAATTCATCCATTCC       |
| cjw2329         | GGAATTCATATGGCGGACGACGCAATTCGCATA                          |
| cjw2330         | CCAAGCTTCTAAATTTACCAATTGCCGACAG                            |
| cjw2424         | CTGGGCCTTTCGTTTTATCTGTTGTTTGTGTCGGCGAGGATCGGTCGGCCAGACGCGG |
| cjw2425         | GAAGTAGTGATCCCCGGGCTGCAGCTAGCCTAGATCTCGCCGATCGCCGACAGA     |
| cjw2426         | CGACAAACAACAGATAAAAACGAAAGGCCAG                            |
| cjw2427         | GCTAGCTGCAGCCCGGGGATCCACTAGTTC                             |

cjlw2614 GTGCAATTGAAGCCGGCTGGCGCCAAGCTTGTGCGCAATGTCATCGTGCGCTGGG  
 cjlw2618 CGACGTTAAGGTGCTCAAGAAGGTGG  
 cjlw2619 CCTAACGCAGTTCGCGGAACGGCAG  
 cjlw2651 CCAGCCTGCGCGAGCAGGGGAATTGGGTGCGGACTTATCCCGCACGCCACGCGCC  
 cjlw2652 CTAGCGAGGGCTTTACTAAGCTGATACCGACCTGCGATTTCCGGCAGGTAGGATT  
 cjlw2653 GAGACGCGTCACGGCCGAAGCTAGCTGCCGGCCACATGAGCGAGGTGCGCGGGCG  
 cjlw2736 GTGCCTAATGAGTGAGCTAAC  
 cjlw2737 GTGGAATTGTGAGCGGATAAC  
 cjlw2738 GTTAGCTCACTCATTAGGCACGAATTCTAAAGATCTTTGACAGCTAG  
 cjlw2739 GTTATCCGCTCACAATTCCACGCAGCGAGTCAGTGAGCG  
 cjlw2746 CAATTCCCCTGCTCGCGCAGGCTGG  
 cjlw2747 ATCAGCTTAGTAAAGCCCTCGCTAG  
 cjlw2748 CGAGGCCCTTTTCGTCTTCAAG  
 cjlw2749 CGAGCGCGGCCGTGAGGCTT  
 cjlw2768 GAGACGTCCAATTGCATATGAACGTTTCCGATCTGGTCGACGCCG  
 cjlw2769 GCTCGAGATCTTAAGGTACCGCCGTTGACGGCGTCTTCAGTTGC  
 EMSA assay  
 cjlw2750 ATTAAGTGCAGTCGGCGAAATTGATCGTGTTTTCGGGGGTGAGCAAGTCG  
 cjlw2751 CGACTTGCTCACCCCCGAAAACACGATCAATTTGCGCCGACTGCACTTAAT

---

206

## 207 Appendix References

- 208 Aaron, M., Charbon, G., Lam, H., Schwarz, H., Vollmer, W., and Jacobs-Wagner, C. (2007).  
 209 The tubulin homologue FtsZ contributes to cell elongation by guiding cell wall precursor  
 210 synthesis in *Caulobacter crescentus*. *Mol Microbiol* 64, 938-952.
- 211 Blattner, F.R., Plunkett, G., 3rd, Bloch, C.A., Perna, N.T., Burland, V., Riley, M., Collado-Vides,  
 212 J., Glasner, J.D., Rode, C.K., Mayhew, G.F., *et al.* (1997). The complete genome sequence of  
 213 *Escherichia coli* K-12. *Science* 277, 1453-1462.
- 214 Deatherage, D.E., and Barrick, J.E. (2014). Identification of mutations in laboratory-evolved  
 215 microbes from next-generation sequencing data using breseq. *Methods Mol Biol* 1151, 165-188.
- 216 Dobin, A., Davis, C.A., Schlesinger, F., Drenkow, J., Zaleski, C., Jha, S., Batut, P., Chaisson,  
 217 M., and Gingeras, T.R. (2013). STAR: ultrafast universal RNA-seq aligner. *Bioinformatics* 29,  
 218 15-21.
- 219 Edgar, R.C. (2004). MUSCLE: multiple sequence alignment with high accuracy and high  
 220 throughput. *Nucleic Acids Res* 32, 1792-1797.
- 221 Evinger, M., and Agabian, N. (1977). Envelope-associated nucleoid from *Caulobacter*  
 222 *crescentus* stalked and swarmer cells. *Journal of bacteriology* 132, 294-301.

223 Figge, R.M., Divakaruni, A.V., and Gober, J.W. (2004). MreB, the cell shape-determining  
224 bacterial actin homologue, co-ordinates cell wall morphogenesis in *Caulobacter crescentus*. *Mol*  
225 *Microbiol* *51*, 1321-1332.

226 Gay, P., Le Coq, D., Steinmetz, M., Berkelman, T., and Kado, C.I. (1985). Positive selection  
227 procedure for entrapment of insertion sequence elements in gram-negative bacteria. *Journal of*  
228 *bacteriology* *164*, 918-921.

229 Georgiades, K., Madoui, M.A., Le, P., Robert, C., and Raoult, D. (2011). Phylogenomic analysis  
230 of *Odysella thessalonicensis* fortifies the common origin of Rickettsiales, *Pelagibacter ubique*  
231 and *Reclimonas americana* mitochondrion. *PloS one* *6*, e24857.

232 Gibson, D.G., Young, L., Chuang, R.Y., Venter, J.C., Hutchison, C.A., 3rd, and Smith, H.O.  
233 (2009). Enzymatic assembly of DNA molecules up to several hundred kilobases. *Nat Methods*  
234 *6*, 343-345.

235 Goley, E.D., Yeh, Y.C., Hong, S.H., Fero, M.J., Abeliuk, E., McAdams, H.H., and Shapiro, L.  
236 (2011). Assembly of the *Caulobacter* cell division machine. *Mol Microbiol* *80*, 1680-1698.

237 Guzman, L.M., Belin, D., Carson, M.J., and Beckwith, J. (1995). Tight regulation, modulation,  
238 and high-level expression by vectors containing the arabinose PBAD promoter. *Journal of*  
239 *bacteriology* *177*, 4121-4130.

240 Kearse, M., Moir, R., Wilson, A., Stones-Havas, S., Cheung, M., Sturrock, S., Buxton, S.,  
241 Cooper, A., Markowitz, S., Duran, C., *et al.* (2012). Geneious Basic: an integrated and  
242 extendable desktop software platform for the organization and analysis of sequence data.  
243 *Bioinformatics* *28*, 1647-1649.

244 Krzywinski, M., Schein, J., Birol, I., Connors, J., Gascoyne, R., Horsman, D., Jones, S.J., and  
245 Marra, M.A. (2009). Circos: an information aesthetic for comparative genomics. *Genome Res*  
246 *19*, 1639-1645.

247 Lam, H., Schofield, W.B., and Jacobs-Wagner, C. (2006). A landmark protein essential for  
248 establishing and perpetuating the polarity of a bacterial cell. *Cell* *124*, 1011-1023.

249 Le, T.B., Imakaev, M.V., Mirny, L.A., and Laub, M.T. (2013). High-resolution mapping of the  
250 spatial organization of a bacterial chromosome. *Science* *342*, 731-734.

251 Li, H., and Durbin, R. (2009). Fast and accurate short read alignment with Burrows-Wheeler  
252 transform. *Bioinformatics* *25*, 1754-1760.

253 Liao, Y., Smyth, G.K., and Shi, W. (2014). featureCounts: an efficient general purpose program  
254 for assigning sequence reads to genomic features. *Bioinformatics* *30*, 923-930.

255 Love, M.I., Huber, W., and Anders, S. (2014). Moderated estimation of fold change and  
256 dispersion for RNA-seq data with DESeq2. *Genome Biol* *15*, 550.

257 Machanick, P., and Bailey, T.L. (2011). MEME-ChIP: motif analysis of large DNA datasets.  
258 *Bioinformatics* *27*, 1696-1697.

259 Modell, J.W., Kambara, T.K., Perchuk, B.S., and Laub, M.T. (2014). A DNA damage-induced,  
260 SOS-independent checkpoint regulates cell division in *Caulobacter crescentus*. *PLoS Biol* 12,  
261 e1001977.

262 Quinlan, A.R., and Hall, I.M. (2010). *The Bedtools manual*.

263 Quon, K.C., Marczyński, G.T., and Shapiro, L. (1996). Cell cycle control by an essential  
264 bacterial two-component signal transduction protein. *Cell* 84, 83-93.

265 Simon R, Priefer U, and A, P. (1984). A broad host range mobilization system for *in vivo* genetic-  
266 engineering - transposon mutagenesis in gram-negative bacteria. *Bio-Technol* 1, 784-791.

267 Sun, H., Yuan, Y., Wu, Y., Liu, H., Liu, J.S., and Xie, H. (2010). Tmod: toolbox of motif  
268 discovery. *Bioinformatics* 26, 405-407.

269 Thanbichler, M., Iniesta, A.A., and Shapiro, L. (2007). A comprehensive set of plasmids for  
270 vanillate- and xylose-inducible gene expression in *Caulobacter crescentus*. *Nucleic Acids Res*  
271 35, e137.

272 Wang, Y., Jones, B.D., and Brun, Y.V. (2001). A set of *ftsZ* mutants blocked at different stages  
273 of cell division in *Caulobacter*. *Mol Microbiol* 40, 347-360.

274 Ward, D., and Newton, A. (1997). Requirement of topoisomerase IV *parC* and *parE* genes for  
275 cell cycle progression and developmental regulation in *Caulobacter crescentus*. *Mol Microbiol*  
276 26, 897-910.

277 Williams, K.P., Sobral, B.W., and Dickerman, A.W. (2007). A robust species tree for the  
278 alphaproteobacteria. *Journal of bacteriology* 189, 4578-4586.

279 Wood, W.B. (1966). Host specificity of DNA produced by *Escherichia coli*: bacterial mutations  
280 affecting the restriction and modification of DNA. *J Mol Biol* 16, 118-133.

281 Zhang, Y., Liu, T., Meyer, C.A., Eeckhoutte, J., Johnson, D.S., Bernstein, B.E., Nusbaum, C.,  
282 Myers, R.M., Brown, M., Li, W., *et al.* (2008). Model-based analysis of ChIP-Seq (MACS).  
283 *Genome Biol* 9, R137.

284 Zweiger, G., Marczyński, G., and Shapiro, L. (1994). A *Caulobacter* DNA methyltransferase that  
285 functions only in the predivisive cell. *J Mol Biol* 235, 472-485.

286
